# Supplementary material
Source: PubMed Central journal article supplement (PMC8418348)
Supplement: awab090_supplementary_data.pdf [file awab090_supplementary_data.pdf]

# Supplemental Material

## Table of contents

### I. Online Tables.

|                                                                                                                      |    |
|----------------------------------------------------------------------------------------------------------------------|----|
| <b>Online Table I.</b> Deleterious effect of parenchymal hematoma in the discovery study subjects.                   | 3  |
| <b>Online Table II.</b> Logistic regression analysis of clinical variables in the discovery cohort.                  | 4  |
| <b>Online Table III.</b> Summary statistics of the discovery, replication and meta-analysis stages.                  | 5  |
| <b>Online Table IV.</b> Complementary genetics analysis including CE stroke as covariate.                            | 12 |
| <b>Online Table V.</b> Genes associated with PH through a gene-set analysis.                                         | 13 |
| <b>Online Table VI.</b> S-Multixcan results.                                                                         | 14 |
| <b>Online Table VII.</b> GNOVA genetic correlation results with cerebrovascular traits.                              | 15 |
| <b>Online Table VIII.</b> Description of poor outcome phenotypes in the replication cohort.                          | 16 |
| <b>Online Table IX.</b> Results of the PRS in the replication cohort.                                                | 17 |
| <b>Online Table X.</b> Multivariable logistic regression results for disability after three months.                  | 18 |
| <b>Online Table XI.</b> Expression quantitative trait loci for rs76484331 over <i>ZBTB46</i> expression.             | 19 |
| <b>Online Table XII.</b> Histone modifications reported for rs76484331.                                              | 20 |
| <b>Online Table XIII.</b> Expression quantitative trait loci for rs76484331 and cis-genes.                           | 23 |
| <b>Online Table XIV.</b> Phenotype associations of rs76484331.                                                       | 24 |
| <b>Online Table XV.</b> Associations of rs76484331 and clinical variants according to the additive model.            | 26 |
| <b>Online Table XVI.</b> Associations of rs76484331 and clinical variants according to the dominant-recessive model. | 27 |

### II. Online Figures.

|                                                                                                              |    |
|--------------------------------------------------------------------------------------------------------------|----|
| <b>Online Figure I.</b> Analysis overview.                                                                   | 28 |
| <b>Online Figure II.</b> Principal components included in the discovery stage.                               | 30 |
| <b>Online Figure III.</b> Principal components included in the replication stage.                            | 31 |
| <b>Online Figure IV.</b> Manhattan plot and QQ plot of the discovery phase.                                  | 32 |
| <b>Online Figure V.</b> Gene expression of <i>ZBTB46</i> in human tissues.                                   | 33 |
| <b>Online Figure VI.</b> Expression of <i>ZBTB46</i> transcript across brain tissues from BRAINEAC database. | 34 |

|                                                                                     |    |
|-------------------------------------------------------------------------------------|----|
| <b>Online Figure VII.</b> Capture Hi-C interactions of rs76484331 in GM12878 cells. | 35 |
| <b>III. Online Methods.</b>                                                         |    |
| I. Description of the cohorts used the discovery stage.                             | 36 |
| II. Description of the cohorts for the replication stage.                           | 37 |
| III. Clinical risk factors definitions.                                             | 38 |
| IV. Genome-Wide Association Studies and meta-analysis quality controls.             | 39 |
| V. Independent genomic loci and functional annotation.                              | 39 |
| VI. URL.                                                                            | 40 |
| <b>IV. Online References.</b>                                                       | 41 |

## I. Online Tables.

**Online Table I.** Deleterious effect of parenchymal hematoma in the discovery study subjects.

|              | <b>In-hospital mortality (n=85)<sup>†</sup></b> |                |                 | <b>p</b> | <b>OR (95% CI)</b> |
|--------------|-------------------------------------------------|----------------|-----------------|----------|--------------------|
|              | <b>Total</b>                                    | <b>Absence</b> | <b>Presence</b> |          |                    |
| PH (%)       | 64 (5)                                          | 46 (3.9)       | 18 (21.2)       | <0.001*  | 6.65 (3.65-12.1)   |
| sICH (%)     | 18 (1.4)                                        | 7 (38.9)       | 11 (61.1)       | <0.001*  | 25.02 (9.42-66.41) |
| non-sICH (%) | 46 (3.7)                                        | 39 (3.3)       | 7 (9.5)         | 0.016*   | 3.05 (1.32-7.08)   |

  

|              | <b>Mortality at 3-months (n=150)<sup>‡</sup></b> |                |                 | <b>p</b> | <b>OR (95% CI)</b> |
|--------------|--------------------------------------------------|----------------|-----------------|----------|--------------------|
|              | <b>Total</b>                                     | <b>Absence</b> | <b>Presence</b> |          |                    |
| PH (%)       | 62 (5.1)                                         | 30 (2.8)       | 32 (21.3)       | <0.001*  | 9.32 (5.47-15.89)  |
| sICH (%)     | 18 (1.5)                                         | 4 (0.4)        | 14 (9.3)        | <0.001*  | 27.20 (8.83-83.83) |
| non-sICH (%) | 44 (3.7)                                         | 26 (2.5)       | 18 (13.2)       | <0.001*  | 6.05 (3.22-11.36)  |

  

|              | <b>Disability 3mRS &gt;2 (n=541)<sup>‡</sup></b> |                |                 | <b>p</b> | <b>OR (95% CI)</b> |
|--------------|--------------------------------------------------|----------------|-----------------|----------|--------------------|
|              | <b>Total</b>                                     | <b>Absence</b> | <b>Presence</b> |          |                    |
| PH (%)       | 62 (5.1)                                         | 8 (1.2)        | 54 (10)         | <0.001*  | 9.17 (4.37-19.5)   |
| sICH (%)     | 18 (1.5)                                         | 1 (0.1)        | 17 (3.1)        | <0.001*  | 21.7 (2.88-163.62) |
| non-sICH (%) | 44 (3.7)                                         | 7 (1)          | 37 (7.1)        | <0.001*  | 7.19 (3.18-16.25)  |

\*p-value <0.05. <sup>†</sup>In-hospital mortality was available in 1270 participants. <sup>‡</sup>3-months modified Ranking Scale was available in 1211 patients. For categorical variables, frequencies as percentage were described.

PH: Parenchymal hematoma; sICH: Symptomatic intracerebral hemorrhage; OR: Odds-ratio. (95%CI): 95% Confidence Interval. 3mRS: 3-months modified Rankin Scale.

**Online Table II.** Logistic regression analysis of clinical variables regarding PH occurrence in the discovery cohort data. Only clinical variables with more than 10 cases and significantly associated in the univariate analysis were included in the logistic regression according to previous methodology of logistic regression (Perduzzi et al., 1996; Ortega Calvo et al., 2002). It is considered in logistic regression analysis that less than 10 cases in each of its possible values the estimates are not reliable (Perduzzi et al., 1996).

|                       | <b>Estimate</b> | <b>Standard Error</b> | <b>Z value</b> | <b>P value</b> |
|-----------------------|-----------------|-----------------------|----------------|----------------|
| <b>Baseline NIHSS</b> | -0.08           | 0.02                  | -4.19          | 2.75E-05       |
| <b>CE (No)</b>        | 0.38            | 0.26                  | 1.47           | 1.41E-01       |
| <b>DM (Yes)</b>       | -0.7            | 0.27                  | -2.63          | 8.52E-03       |

**Online Table III.** Summary statistics of the discovery, replication and meta-analysis stages.

| SNP         | CHR | POS       | Location | Gene          | EA / NEA | OR      |      |          |          |          | p       |      |          |      |                  | p(GC)       |    |       |           |       |
|-------------|-----|-----------|----------|---------------|----------|---------|------|----------|----------|----------|---------|------|----------|------|------------------|-------------|----|-------|-----------|-------|
|             |     |           |          |               |          | Absence |      | Presence |          |          | Absence |      | Presence |      |                  | OR (95% CI) |    | p     | Direction | p Het |
|             |     |           |          |               |          | OR      | p    | OR       | p        | p(GC)    | OR      | p    | OR       | p    | OR               | p           | OR | p     | Direction | p Het |
| rs77557904  | 2   | 1047076   | intronic | <i>SNTG2</i>  | G/C      | 0.05    | 0.15 | 6.56     | 8.62E-07 | 8.78E-07 | 0.06    | 0.09 | 2.01     | 0.1  | 3.82 (2.19-6.68) | 2.43E-06    | ++ | <0.05 |           |       |
| rs62172138  | 2   | 77038345  | intronic | <i>LRRTM4</i> | T/C      | 0.17    | 0.33 | 2.64     | 8.92E-06 | 9.08E-06 | 0.14    | 0.15 | 1.19     | 0.52 | 1.93 (1.38-2.70) | 1.31E-04    | ++ | <0.05 |           |       |
| rs11687998  | 2   | 106384133 | intronic | <i>NCK2</i>   | T/C      | 0.20    | 0.37 | 2.76     | 2.48E-06 | 2.52E-06 | 0.19    | 0.21 | 0.98     | 0.92 | 1.77 (1.28-2.45) | 5.15E-04    | +- | <0.05 |           |       |
| rs72824713  | 2   | 109986438 | intronic | <i>SH3RF3</i> | A/G      | 0.07    | 0.15 | 5.38     | 5.68E-06 | 5.78E-06 | 0.1     | 0.07 | 0.62     | 0.16 | 1.66 (1.01-2.72) | 4.55E-02    | +- | <0.05 |           |       |
| rs112541215 | 2   | 218916291 | intronic | <i>RUFY4</i>  | A/T      | 0.07    | 0.18 | 4.67     | 3.76E-06 | 3.83E-06 | 0.07    | 0.14 | 1.90     | 0.07 | 3.01 (1.88-4.84) | 4.79E-06    | ++ | 0.06  |           |       |
| rs35942239  | 3   | 16637561  | intronic | <i>DAZL</i>   | A/C      | 0.10    | 0.22 | 4.19     | 8.29E-07 | 8.44E-07 | 0.07    | 0.09 | 0.83     | 0.62 | 2.28 (1.45-3.59) | 3.80E-04    | +- | <0.05 |           |       |
| rs72811500  | 5   | 160723914 | intronic | <i>GABRB2</i> | A/G      | 0.05    | 0.15 | 5.36     | 3.46E-06 | 3.52E-06 | 0.09    | 0.11 | 1.34     | 0.41 | 2.62 (1.59-4.32) | 1.50E-04    | ++ | <0.05 |           |       |
| rs980161    | 5   | 160725431 | intronic | <i>GABRB2</i> | C/T      | 0.05    | 0.15 | 5.21     | 4.36E-06 | 4.44E-06 | 0.09    | 0.11 | 1.34     | 0.41 | 2.60 (1.58-4.27) | 1.65E-04    | ++ | <0.05 |           |       |
| rs72811501  | 5   | 160725911 | intronic | <i>GABRB2</i> | C/A      | 0.05    | 0.15 | 5.45     | 2.77E-06 | 2.82E-06 | 0.09    | 0.11 | 1.34     | 0.41 | 2.65 (1.61-4.36) | 1.32E-04    | ++ | <0.05 |           |       |
| rs72813504  | 5   | 160728749 | intronic | <i>GABRB2</i> | C/T      | 0.05    | 0.15 | 5.78     | 1.64E-06 | 1.67E-06 | 0.09    | 0.11 | 1.34     | 0.41 | 2.70 (1.63-4.46) | 1.05E-04    | ++ | <0.05 |           |       |
| rs72813505  | 5   | 160730811 | intronic | <i>GABRB2</i> | T/C      | 0.05    | 0.15 | 5.58     | 2.19E-06 | 2.23E-06 | 0.1     | 0.11 | 1.32     | 0.43 | 2.65 (1.61-4.37) | 1.27E-04    | ++ | <0.05 |           |       |
| rs111707489 | 5   | 160734952 | intronic | <i>GABRB2</i> | A/G      | 0.06    | 0.16 | 4.78     | 6.42E-06 | 6.54E-06 | 0.12    | 0.11 | 1.17     | 0.65 | 2.32 (1.44-3.74) | 5.74E-04    | ++ | <0.05 |           |       |
| rs112594362 | 5   | 160737314 | intronic | <i>GABRB2</i> | C/T      | 0.06    | 0.16 | 4.72     | 7.14E-06 | 7.27E-06 | 0.12    | 0.11 | 1.17     | 0.65 | 2.31 (1.43-3.72) | 6.01E-04    | ++ | <0.05 |           |       |
| rs72813508  | 5   | 160740393 | intronic | <i>GABRB2</i> | A/G      | 0.06    | 0.16 | 5.25     | 2.42E-06 | 2.46E-06 | 0.12    | 0.11 | 1.18     | 0.63 | 2.42 (1.49-3.92) | 3.34E-04    | ++ | <0.05 |           |       |
| rs72813510  | 5   | 160741355 | intronic | <i>GABRB2</i> | G/A      | 0.06    | 0.16 | 4.72     | 7.14E-06 | 7.27E-06 | 0.12    | 0.11 | 1.17     | 0.65 | 2.31 (1.43-3.72) | 6.01E-04    | ++ | <0.05 |           |       |
| rs72813511  | 5   | 160741696 | intronic | <i>GABRB2</i> | G/C      | 0.06    | 0.16 | 4.72     | 7.14E-06 | 7.27E-06 | 0.12    | 0.11 | 1.17     | 0.65 | 2.31 (1.43-3.72) | 6.01E-04    | ++ | <0.05 |           |       |
| rs113801494 | 5   | 160743772 | intronic | <i>GABRB2</i> | C/T      | 0.06    | 0.16 | 4.72     | 7.14E-06 | 7.27E-06 | 0.12    | 0.11 | 1.17     | 0.65 | 2.31 (1.43-3.72) | 6.01E-04    | ++ | <0.05 |           |       |
| rs72813513  | 5   | 160745005 | intronic | <i>GABRB2</i> | C/T      | 0.06    | 0.16 | 4.72     | 7.14E-06 | 7.27E-06 | 0.12    | 0.11 | 1.17     | 0.65 | 2.31 (1.43-3.72) | 6.01E-04    | ++ | <0.05 |           |       |
| rs72813515  | 5   | 160748460 | intronic | <i>GABRB2</i> | T/C      | 0.06    | 0.16 | 4.72     | 7.14E-06 | 7.27E-06 | 0.12    | 0.11 | 1.17     | 0.65 | 2.31 (1.43-3.72) | 6.01E-04    | ++ | <0.05 |           |       |
| rs80343625  | 5   | 160752739 | intronic | <i>GABRB2</i> | T/C      | 0.06    | 0.16 | 4.72     | 7.14E-06 | 7.27E-06 | 0.12    | 0.11 | 1.17     | 0.65 | 2.31 (1.43-3.72) | 6.01E-04    | ++ | <0.05 |           |       |
| rs10068979  | 5   | 160755605 | intronic | <i>GABRB2</i> | T/C      | 0.06    | 0.16 | 4.69     | 7.64E-06 | 7.78E-06 | 0.12    | 0.11 | 1.17     | 0.65 | 2.30 (1.43-3.71) | 6.20E-04    | ++ | <0.05 |           |       |
| rs10052351  | 5   | 160757462 | intronic | <i>GABRB2</i> | C/T      | 0.06    | 0.16 | 4.69     | 7.64E-06 | 7.78E-06 | 0.12    | 0.11 | 1.15     | 0.67 | 2.29 (1.42-3.68) | 6.80E-04    | ++ | <0.05 |           |       |

|             |   |           |            |        |     |      |      |      |          |          |      |      |      |      |                  |          |    |       |
|-------------|---|-----------|------------|--------|-----|------|------|------|----------|----------|------|------|------|------|------------------|----------|----|-------|
| rs10060079  | 5 | 160759046 | intronic   | GABRB2 | A/G | 0.06 | 0.16 | 4.69 | 7.64E-06 | 7.78E-06 | 0.12 | 0.11 | 1.17 | 0.65 | 2.30 (1.43-3.71) | 6.20E-04 | ++ | <0.05 |
| rs112795377 | 5 | 160759105 | intronic   | GABRB2 | A/G | 0.06 | 0.16 | 4.72 | 7.14E-06 | 7.27E-06 | 0.12 | 0.11 | 1.17 | 0.65 | 2.31 (1.43-3.72) | 6.01E-04 | ++ | <0.05 |
| rs10060148  | 5 | 160759144 | intronic   | GABRB2 | A/G | 0.06 | 0.16 | 4.69 | 7.64E-06 | 7.78E-06 | 0.12 | 0.11 | 1.15 | 0.67 | 2.29 (1.42-3.68) | 6.80E-04 | ++ | <0.05 |
| rs72817451  | 5 | 161164047 | intergenic | GABRA1 | G/A | 0.05 | 0.15 | 4.97 | 9.57E-06 | 9.74E-06 | 0.11 | 0.12 | 1.56 | 0.19 | 2.67 (1.64-4.36) | 8.10E-05 | ++ | <0.05 |
| rs72817454  | 5 | 161166243 | intergenic | GABRA1 | G/A | 0.05 | 0.15 | 4.97 | 9.57E-06 | 9.74E-06 | 0.11 | 0.12 | 1.56 | 0.19 | 2.67 (1.64-4.36) | 8.10E-05 | ++ | <0.05 |
| rs72817470  | 5 | 161219798 | intergenic | GABRA1 | T/C | 0.05 | 0.13 | 5.58 | 9.48E-06 | 9.65E-06 | 0.11 | 0.13 | 1.75 | 0.1  | 2.90 (1.75-4.80) | 3.83E-05 | ++ | <0.05 |
| rs6932387   | 6 | 4515915   | intergenic | CDYL   | A/G | 0.27 | 0.44 | 2.64 | 1.67E-06 | 1.70E-06 | 0.34 | 0.25 | 0.69 | 0.08 | 1.40 (1.04-1.87) | 2.50E-02 | +- | <0.05 |
| rs17209853  | 6 | 45374699  | intronic   | RUNX2  | T/A | 0.07 | 0.17 | 4.40 | 8.20E-06 | 8.35E-06 | 0.12 | 0.06 | 0.71 | 0.33 | 1.83 (1.14-2.93) | 1.23E-02 | +- | <0.05 |
| rs78488630  | 6 | 45376859  | intronic   | RUNX2  | C/T | 0.07 | 0.17 | 4.40 | 8.20E-06 | 8.35E-06 | 0.12 | 0.06 | 0.71 | 0.33 | 1.83 (1.14-2.93) | 1.23E-02 | +- | <0.05 |
| rs75864224  | 6 | 45377777  | intronic   | RUNX2  | G/A | 0.07 | 0.17 | 4.36 | 8.95E-06 | 9.11E-06 | 0.12 | 0.06 | 0.71 | 0.33 | 1.82 (1.14-2.92) | 1.26E-02 | +- | <0.05 |
| rs75988681  | 6 | 45377848  | intronic   | RUNX2  | T/C | 0.07 | 0.17 | 4.40 | 8.20E-06 | 8.35E-06 | 0.12 | 0.06 | 0.71 | 0.33 | 1.83 (1.14-2.93) | 1.23E-02 | +- | <0.05 |
| rs79359769  | 6 | 45378973  | intronic   | RUNX2  | G/A | 0.07 | 0.17 | 4.40 | 8.20E-06 | 8.35E-06 | 0.12 | 0.06 | 0.71 | 0.33 | 1.83 (1.14-2.93) | 1.23E-02 | +- | <0.05 |
| rs113673672 | 6 | 45380647  | intronic   | RUNX2  | G/T | 0.07 | 0.17 | 4.40 | 8.20E-06 | 8.35E-06 | 0.12 | 0.06 | 0.71 | 0.33 | 1.83 (1.14-2.93) | 1.23E-02 | +- | <0.05 |
| rs76954735  | 6 | 45381082  | intronic   | RUNX2  | G/A | 0.07 | 0.17 | 4.40 | 8.20E-06 | 8.35E-06 | 0.12 | 0.06 | 0.71 | 0.33 | 1.83 (1.14-2.93) | 1.23E-02 | +- | <0.05 |
| rs4413614   | 6 | 45381328  | intronic   | RUNX2  | C/T | 0.07 | 0.17 | 4.36 | 8.95E-06 | 9.11E-06 | 0.12 | 0.06 | 0.71 | 0.33 | 1.82 (1.14-2.92) | 1.26E-02 | +- | <0.05 |
| rs4370348   | 6 | 45381399  | intronic   | RUNX2  | T/C | 0.07 | 0.17 | 4.40 | 8.20E-06 | 8.35E-06 | 0.12 | 0.06 | 0.71 | 0.33 | 1.83 (1.14-2.93) | 1.23E-02 | +- | <0.05 |
| rs17209874  | 6 | 45381584  | intronic   | RUNX2  | A/G | 0.07 | 0.17 | 4.40 | 8.20E-06 | 8.35E-06 | 0.12 | 0.06 | 0.71 | 0.33 | 1.83 (1.14-2.93) | 1.23E-02 | +- | <0.05 |
| rs77252578  | 6 | 45381770  | intronic   | RUNX2  | A/T | 0.07 | 0.17 | 4.40 | 8.20E-06 | 8.35E-06 | 0.12 | 0.06 | 0.71 | 0.33 | 1.83 (1.14-2.93) | 1.23E-02 | +- | <0.05 |
| rs1004130   | 6 | 45382093  | intronic   | RUNX2  | T/C | 0.07 | 0.17 | 4.40 | 8.20E-06 | 8.35E-06 | 0.12 | 0.06 | 0.71 | 0.33 | 1.83 (1.14-2.93) | 1.23E-02 | +- | <0.05 |
| rs75205636  | 6 | 45384467  | intronic   | RUNX2  | A/C | 0.07 | 0.17 | 4.40 | 8.06E-06 | 8.21E-06 | 0.12 | 0.06 | 0.71 | 0.33 | 1.83 (1.14-2.94) | 1.22E-02 | +- | <0.05 |
| rs7768466   | 6 | 45385439  | intronic   | RUNX2  | T/C | 0.07 | 0.17 | 4.57 | 5.56E-06 | 5.66E-06 | 0.12 | 0.06 | 0.71 | 0.33 | 1.85 (1.15-2.98) | 1.08E-02 | +- | <0.05 |
| rs7768666   | 6 | 45385607  | intronic   | RUNX2  | C/A | 0.07 | 0.17 | 4.57 | 5.56E-06 | 5.66E-06 | 0.12 | 0.06 | 0.71 | 0.33 | 1.85 (1.15-2.98) | 1.08E-02 | +- | <0.05 |
| rs17288397  | 6 | 45385742  | intronic   | RUNX2  | A/G | 0.07 | 0.17 | 4.57 | 5.56E-06 | 5.66E-06 | 0.12 | 0.06 | 0.71 | 0.33 | 1.85 (1.15-2.98) | 1.08E-02 | +- | <0.05 |
| rs77131077  | 6 | 45386096  | intronic   | RUNX2  | T/C | 0.07 | 0.17 | 4.57 | 5.56E-06 | 5.66E-06 | 0.12 | 0.06 | 0.71 | 0.33 | 1.85 (1.15-2.98) | 1.08E-02 | +- | <0.05 |
| rs74872917  | 6 | 45387663  | intronic   | RUNX2  | A/G | 0.07 | 0.17 | 4.57 | 5.56E-06 | 5.66E-06 | 0.12 | 0.06 | 0.71 | 0.33 | 1.85 (1.15-2.98) | 1.08E-02 | +- | <0.05 |
| rs7751427   | 6 | 45389234  | intronic   | RUNX2  | G/A | 0.07 | 0.17 | 4.53 | 6.08E-06 | 6.19E-06 | 0.12 | 0.06 | 0.71 | 0.33 | 1.85 (1.15-2.97) | 1.11E-02 | +- | <0.05 |
| rs7771980   | 6 | 45389289  | intronic   | RUNX2  | C/T | 0.07 | 0.17 | 4.53 | 6.08E-06 | 6.19E-06 | 0.12 | 0.06 | 0.71 | 0.33 | 1.85 (1.15-2.97) | 1.11E-02 | +- | <0.05 |
| rs6921145   | 6 | 45390511  | Synonymous | RUNX2  | A/G | 0.07 | 0.17 | 4.57 | 5.56E-06 | 5.66E-06 | 0.12 | 0.06 | 0.71 | 0.33 | 1.85 (1.15-2.98) | 1.08E-02 | +- | <0.05 |

|                  |   |           |            |               |     |      |      |      |          |          |      |      |      |                 |                         |                 |    |             |
|------------------|---|-----------|------------|---------------|-----|------|------|------|----------|----------|------|------|------|-----------------|-------------------------|-----------------|----|-------------|
| rs3749864        | 6 | 45390733  | intronic   | <i>RUNX2</i>  | C/G | 0.07 | 0.17 | 4.57 | 5.56E-06 | 5.66E-06 | 0.12 | 0.06 | 0.71 | 0.33            | 1.85 (1.15-2.98)        | 1.08E-02        | +- | <0.05       |
| rs11498195       | 6 | 45390949  | intronic   | <i>RUNX2</i>  | C/G | 0.07 | 0.17 | 4.57 | 5.56E-06 | 5.66E-06 | 0.12 | 0.06 | 0.71 | 0.33            | 1.85 (1.15-2.98)        | 1.08E-02        | +- | <0.05       |
| rs3805811        | 6 | 45391654  | intronic   | <i>RUNX2</i>  | C/G | 0.07 | 0.17 | 4.54 | 5.93E-06 | 6.04E-06 | 0.12 | 0.06 | 0.69 | 0.29            | 1.80 (1.13-2.89)        | 1.41E-02        | +- | <0.05       |
| rs3792952        | 6 | 45391971  | intronic   | <i>RUNX2</i>  | T/C | 0.07 | 0.17 | 4.57 | 5.56E-06 | 5.66E-06 | 0.12 | 0.06 | 0.71 | 0.33            | 1.85 (1.15-2.98)        | 1.08E-02        | +- | <0.05       |
| rs3828722        | 6 | 45392982  | intronic   | <i>RUNX2</i>  | G/A | 0.07 | 0.17 | 4.57 | 5.56E-06 | 5.66E-06 | 0.12 | 0.06 | 0.71 | 0.33            | 1.85 (1.15-2.98)        | 1.08E-02        | +- | <0.05       |
| rs3828723        | 6 | 45393010  | intronic   | <i>RUNX2</i>  | G/A | 0.07 | 0.17 | 4.57 | 5.56E-06 | 5.66E-06 | 0.12 | 0.06 | 0.71 | 0.33            | 1.85 (1.15-2.98)        | 1.08E-02        | +- | <0.05       |
| rs75870189       | 6 | 45394252  | intronic   | <i>RUNX2</i>  | T/C | 0.07 | 0.17 | 4.57 | 5.56E-06 | 5.66E-06 | 0.12 | 0.06 | 0.71 | 0.33            | 1.85 (1.15-2.98)        | 1.08E-02        | +- | <0.05       |
| rs3805818        | 6 | 45395920  | intronic   | <i>RUNX2</i>  | G/A | 0.07 | 0.17 | 4.57 | 5.56E-06 | 5.66E-06 | 0.12 | 0.06 | 0.71 | 0.33            | 1.85 (1.15-2.98)        | 1.08E-02        | +- | <0.05       |
| rs78645638       | 6 | 45396182  | intronic   | <i>RUNX2</i>  | A/G | 0.07 | 0.17 | 4.57 | 5.56E-06 | 5.66E-06 | 0.12 | 0.06 | 0.71 | 0.33            | 1.85 (1.15-2.98)        | 1.08E-02        | +- | <0.05       |
| rs59397804       | 6 | 45397695  | intronic   | <i>RUNX2</i>  | A/G | 0.07 | 0.17 | 4.53 | 5.90E-06 | 6.01E-06 | 0.12 | 0.06 | 0.73 | 0.36            | 1.87 (1.17-3.01)        | 9.51E-03        | +- | <0.05       |
| rs78417039       | 6 | 45399017  | intronic   | <i>RUNX2</i>  | A/G | 0.07 | 0.17 | 4.53 | 5.90E-06 | 6.01E-06 | 0.12 | 0.06 | 0.73 | 0.36            | 1.87 (1.17-3.01)        | 9.51E-03        | +- | <0.05       |
| rs17209881       | 6 | 45400146  | intronic   | <i>RUNX2</i>  | G/A | 0.07 | 0.17 | 4.53 | 5.90E-06 | 6.01E-06 | 0.12 | 0.06 | 0.73 | 0.36            | 1.87 (1.17-3.01)        | 9.51E-03        | +- | <0.05       |
| rs7750743        | 6 | 156867156 | intergenic | <i>ARID1B</i> | T/G | 0.05 | 0.13 | 6.19 | 9.38E-06 | 9.55E-06 | 0.07 | 0.04 | 0.63 | 0.29            | 2.06 (1.15-3.70)        | 1.56E-02        | +- | <0.05       |
| rs73179383       | 7 | 83803592  | intronic   | <i>SEMA3A</i> | C/T | 0.06 | 0.17 | 5.05 | 1.95E-06 | 1.99E-06 | 0.07 | 0.12 | 2.19 | <b>0.04</b>     | <b>3.51 (2.12-5.81)</b> | <b>1.13E-06</b> | ++ | <b>0.11</b> |
| rs78128773       | 7 | 83805039  | intronic   | <i>SEMA3A</i> | A/C | 0.06 | 0.17 | 5.05 | 1.95E-06 | 1.99E-06 | 0.07 | 0.12 | 2.19 | <b>0.04</b>     | <b>3.51 (2.12-5.81)</b> | <b>1.13E-06</b> | ++ | <b>0.11</b> |
| rs7808707        | 7 | 83805716  | intronic   | <i>SEMA3A</i> | C/T | 0.06 | 0.17 | 5.05 | 1.95E-06 | 1.99E-06 | 0.07 | 0.12 | 2.19 | <b>0.04</b>     | <b>3.51 (2.12-5.81)</b> | <b>1.13E-06</b> | ++ | <b>0.11</b> |
| rs77933839       | 7 | 83808925  | intronic   | <i>SEMA3A</i> | A/T | 0.06 | 0.17 | 5.05 | 1.95E-06 | 1.99E-06 | 0.07 | 0.12 | 2.19 | <b>0.04</b>     | <b>3.51 (2.12-5.81)</b> | <b>1.13E-06</b> | ++ | <b>0.11</b> |
| rs76623058       | 7 | 83809657  | intronic   | <i>SEMA3A</i> | G/T | 0.06 | 0.17 | 5.05 | 1.95E-06 | 1.99E-06 | 0.07 | 0.12 | 2.19 | <b>0.04</b>     | <b>3.51 (2.12-5.81)</b> | <b>1.13E-06</b> | ++ | <b>0.11</b> |
| rs77423492       | 7 | 83810623  | intronic   | <i>SEMA3A</i> | C/T | 0.06 | 0.17 | 5.05 | 1.95E-06 | 1.99E-06 | 0.07 | 0.12 | 2.19 | <b>0.04</b>     | <b>3.51 (2.12-5.81)</b> | <b>1.13E-06</b> | ++ | <b>0.11</b> |
| rs9642178        | 7 | 83814352  | intronic   | <i>SEMA3A</i> | C/T | 0.06 | 0.17 | 5.05 | 1.95E-06 | 1.99E-06 | 0.07 | 0.12 | 2.19 | <b>0.04</b>     | <b>3.51 (2.12-5.81)</b> | <b>1.13E-06</b> | ++ | <b>0.11</b> |
| rs10256270       | 7 | 83821402  | intronic   | <i>SEMA3A</i> | G/A | 0.06 | 0.17 | 5.05 | 1.95E-06 | 1.99E-06 | 0.07 | 0.12 | 2.19 | <b>0.04</b>     | <b>3.51 (2.12-5.81)</b> | <b>1.13E-06</b> | ++ | <b>0.11</b> |
| rs73179400       | 7 | 83827813  | Upstream   | <i>SEMA3A</i> | T/C | 0.06 | 0.17 | 5.05 | 1.95E-06 | 1.99E-06 | 0.07 | 0.12 | 2.19 | <b>0.04</b>     | <b>3.51 (2.12-5.81)</b> | <b>1.13E-06</b> | ++ | <b>0.11</b> |
| rs73181306       | 7 | 83836989  | intronic   | <i>SEMA3A</i> | C/T | 0.06 | 0.17 | 5.07 | 1.87E-06 | 1.90E-06 | 0.07 | 0.12 | 2.19 | <b>0.04</b>     | <b>3.51 (2.12-5.83)</b> | <b>1.10E-06</b> | ++ | <b>0.11</b> |
| rs7804323        | 7 | 83837045  | intronic   | <i>SEMA3A</i> | T/C | 0.06 | 0.18 | 5.59 | 2.51E-07 | 2.56E-07 | 0.07 | 0.13 | 2.06 | 0.05            | 3.57 (2.19-5.83)        | 3.62E-07        | ++ | <0.05       |
| <b>rs1962779</b> | 7 | 83837734  | intronic   | <i>SEMA3A</i> | C/G | 0.17 | 0.32 | 2.94 | 2.77E-06 | 2.82E-06 | 0.2  | 0.34 | 2.00 | <b>3.34E-03</b> | <b>2.43 (1.76-3.37)</b> | <b>7.85E-08</b> | ++ | <b>0.25</b> |
| rs73181369       | 7 | 83838055  | intronic   | <i>SEMA3A</i> | C/T | 0.06 | 0.17 | 5.05 | 1.96E-06 | 2.00E-06 | 0.07 | 0.12 | 2.09 | 0.06            | 3.42 (2.07-5.65)        | 1.68E-06        | ++ | 0.09        |
| rs73181375       | 7 | 83841037  | intronic   | <i>SEMA3A</i> | A/G | 0.06 | 0.17 | 5.05 | 1.96E-06 | 2.00E-06 | 0.07 | 0.12 | 1.95 | 0.08            | 3.29 (2.00-5.42)        | 2.90E-06        | ++ | 0.06        |
| rs12333631       | 7 | 83847574  | intronic   | <i>SEMA3A</i> | A/T | 0.06 | 0.17 | 4.95 | 2.40E-06 | 2.44E-06 | 0.07 | 0.12 | 2.04 | 0.06            | 3.34 (2.03-5.50)        | 2.24E-06        | ++ | 0.08        |



|             |   |           |            |         |     |      |      |      |          |          |      |      |      |             |                         |                 |    |             |
|-------------|---|-----------|------------|---------|-----|------|------|------|----------|----------|------|------|------|-------------|-------------------------|-----------------|----|-------------|
| rs7802925   | 7 | 83857204  | intronic   | SEMA3A  | C/T | 0.06 | 0.18 | 5.30 | 7.29E-07 | 7.42E-07 | 0.07 | 0.14 | 2.39 | <b>0.02</b> | <b>3.69 (2.26-6.04)</b> | <b>1.94E-07</b> | ++ | <b>0.11</b> |
| rs73181392  | 7 | 83860527  | intronic   | SEMA3A  | C/T | 0.06 | 0.17 | 5.35 | 1.14E-06 | 1.16E-06 | 0.07 | 0.12 | 2.04 | 0.06        | 3.46 (2.09-5.72)        | 1.40E-06        | ++ | 0.06        |
| rs10264700  | 7 | 83862435  | intronic   | SEMA3A  | T/C | 0.06 | 0.18 | 5.78 | 1.85E-07 | 1.88E-07 | 0.08 | 0.13 | 1.86 | 0.09        | 3.40 (2.09-5.53)        | 7.92E-07        | ++ | <0.05       |
| rs149766679 | 7 | 83870566  | intronic   | SEMA3A  | T/C | 0.06 | 0.17 | 5.42 | 1.00E-06 | 1.02E-06 | 0.07 | 0.12 | 2.04 | 0.06        | 3.48 (2.10-5.75)        | 1.28E-06        | ++ | 0.06        |
| rs28884542  | 7 | 83873691  | intronic   | SEMA3A  | A/G | 0.06 | 0.17 | 5.42 | 1.00E-06 | 1.02E-06 | 0.07 | 0.12 | 2.04 | 0.06        | 3.48 (2.10-5.75)        | 1.28E-06        | ++ | 0.06        |
| rs977752    | 7 | 83881990  | intronic   | SEMA3A  | T/C | 0.06 | 0.17 | 5.42 | 1.00E-06 | 1.02E-06 | 0.07 | 0.12 | 2.04 | 0.06        | 3.48 (2.10-5.75)        | 1.28E-06        | ++ | 0.06        |
| rs73183125  | 7 | 83882827  | intronic   | SEMA3A  | T/C | 0.05 | 0.14 | 5.55 | 6.78E-06 | 6.90E-06 | 0.07 | 0.13 | 2.43 | <b>0.02</b> | <b>3.68 (2.16-6.26)</b> | <b>1.68E-06</b> | ++ | <b>0.13</b> |
| rs1356804   | 7 | 83885441  | intronic   | SEMA3A  | C/T | 0.06 | 0.17 | 5.43 | 9.74E-07 | 9.92E-07 | 0.07 | 0.12 | 2.04 | 0.06        | 3.48 (2.10-5.76)        | 1.26E-06        | ++ | 0.06        |
| rs73185111  | 7 | 83897777  | intronic   | SEMA3A  | T/G | 0.06 | 0.17 | 4.56 | 5.57E-06 | 5.67E-06 | 0.07 | 0.12 | 1.89 | 0.09        | 3.08 (1.88-5.03)        | 7.36E-06        | ++ | 0.08        |
| rs28397702  | 7 | 83899831  | intronic   | SEMA3A  | C/T | 0.06 | 0.17 | 4.45 | 7.36E-06 | 7.49E-06 | 0.07 | 0.12 | 1.89 | 0.09        | 3.04 (1.86-4.96)        | 8.90E-06        | ++ | 0.09        |
| rs10224865  | 7 | 83900221  | intronic   | SEMA3A  | T/G | 0.06 | 0.17 | 5.26 | 1.38E-06 | 1.40E-06 | 0.07 | 0.12 | 2.04 | 0.06        | 3.43 (2.07-5.67)        | 1.59E-06        | ++ | 0.07        |
| rs58835109  | 7 | 83901404  | intronic   | SEMA3A  | C/T | 0.06 | 0.17 | 5.42 | 1.00E-06 | 1.02E-06 | 0.07 | 0.12 | 2.04 | 0.06        | 3.48 (2.10-5.75)        | 1.28E-06        | ++ | 0.06        |
| rs73185120  | 7 | 83903085  | intronic   | SEMA3A  | T/C | 0.06 | 0.17 | 5.26 | 1.38E-06 | 1.40E-06 | 0.07 | 0.12 | 2.04 | 0.06        | 3.43 (2.07-5.67)        | 1.59E-06        | ++ | 0.07        |
| rs76691117  | 7 | 83908179  | intronic   | SEMA3A  | G/A | 0.06 | 0.17 | 4.38 | 8.59E-06 | 8.74E-06 | 0.07 | 0.12 | 1.89 | 0.09        | 3.02 (1.85-4.92)        | 9.86E-06        | ++ | 0.09        |
| rs73185127  | 7 | 83909859  | intronic   | SEMA3A  | A/G | 0.06 | 0.17 | 5.32 | 1.20E-06 | 1.22E-06 | 0.07 | 0.12 | 2.04 | 0.06        | 3.45 (2.08-5.70)        | 1.44E-06        | ++ | 0.06        |
| rs1006795   | 7 | 83911148  | intronic   | SEMA3A  | A/G | 0.06 | 0.17 | 4.33 | 9.75E-06 | 9.93E-06 | 0.07 | 0.12 | 1.89 | 0.09        | 3.00 (1.84-4.89)        | 1.08E-05        | ++ | 0.10        |
| rs6978737   | 7 | 83911749  | intronic   | SEMA3A  | C/T | 0.06 | 0.17 | 4.33 | 9.75E-06 | 9.93E-06 | 0.07 | 0.12 | 1.89 | 0.09        | 3.00 (1.84-4.89)        | 1.08E-05        | ++ | 0.10        |
| rs73185135  | 7 | 83916111  | intronic   | SEMA3A  | A/G | 0.06 | 0.17 | 5.25 | 1.40E-06 | 1.43E-06 | 0.07 | 0.12 | 2.04 | 0.06        | 3.43 (2.07-5.66)        | 1.60E-06        | ++ | 0.07        |
| rs6972377   | 7 | 83923643  | intronic   | SEMA3A  | T/A | 0.06 | 0.17 | 5.16 | 1.66E-06 | 1.69E-06 | 0.07 | 0.12 | 2.04 | 0.06        | 3.40 (2.06-5.62)        | 1.78E-06        | ++ | 0.07        |
| rs6953184   | 7 | 83923740  | intronic   | SEMA3A  | A/C | 0.06 | 0.17 | 5.16 | 1.66E-06 | 1.69E-06 | 0.07 | 0.12 | 2.04 | 0.06        | 3.40 (2.06-5.62)        | 1.78E-06        | ++ | 0.07        |
| rs149386527 | 7 | 83928114  | intronic   | SEMA3A  | T/A | 0.06 | 0.18 | 4.74 | 2.46E-06 | 2.50E-06 | 0.07 | 0.12 | 1.89 | 0.09        | 3.16 (1.94-5.15)        | 3.85E-06        | ++ | 0.07        |
| rs10258884  | 7 | 83931034  | intronic   | SEMA3A  | T/C | 0.06 | 0.18 | 5.44 | 5.93E-07 | 6.04E-07 | 0.07 | 0.12 | 1.82 | 0.11        | 3.30 (2.01-5.42)        | 2.25E-06        | ++ | <0.05       |
| rs17158818  | 7 | 83931950  | intronic   | SEMA3A  | A/G | 0.06 | 0.18 | 5.53 | 4.97E-07 | 5.06E-07 | 0.07 | 0.12 | 2.04 | 0.06        | 3.54 (2.15-5.84)        | 7.15E-07        | ++ | 0.05        |
| rs6949774   | 7 | 83934959  | intronic   | SEMA3A  | T/C | 0.06 | 0.18 | 5.53 | 4.97E-07 | 5.06E-07 | 0.07 | 0.12 | 2.04 | 0.06        | 3.54 (2.15-5.84)        | 7.15E-07        | ++ | 0.05        |
| rs73189024  | 7 | 83942573  | intronic   | SEMA3A  | T/C | 0.06 | 0.17 | 5.02 | 2.34E-06 | 2.38E-06 | 0.07 | 0.12 | 2.04 | 0.06        | 3.35 (2.03-5.53)        | 2.27E-06        | ++ | 0.08        |
| rs17158848  | 7 | 83950725  | intronic   | SEMA3A  | A/T | 0.06 | 0.16 | 4.60 | 8.84E-06 | 9.00E-06 | 0.07 | 0.12 | 2.04 | 0.06        | 3.19 (1.93-5.27)        | 6.19E-06        | ++ | 0.12        |
| rs73189039  | 7 | 83953457  | intronic   | SEMA3A  | A/G | 0.06 | 0.16 | 4.69 | 7.23E-06 | 7.36E-06 | 0.07 | 0.12 | 2.12 | 0.05        | 3.28 (1.98-5.43)        | 4.09E-06        | ++ | 0.12        |
| rs11786105  | 8 | 134786375 | Downstream | ST3GALI | C/T | 0.37 | 0.54 | 2.26 | 9.20E-06 | 9.37E-06 | 0.38 | 0.35 | 0.83 | 0.36        | 1.43 (1.09-1.87)        | 8.80E-03        | +- | <0.05       |

|             |    |           |            |                  |     |      |      |      |          |          |      |      |      |             |                         |                 |    |             |
|-------------|----|-----------|------------|------------------|-----|------|------|------|----------|----------|------|------|------|-------------|-------------------------|-----------------|----|-------------|
| rs1361153   | 10 | 8458317   | intergenic | <i>GATA3</i>     | T/C | 0.05 | 0.13 | 6.64 | 2.60E-06 | 2.65E-06 | 0.06 | 0.04 | 0.73 | 0.45        | 2.25 (1.28-3.98)        | 5.13E-03        | +- | <0.05       |
| rs77200798  | 10 | 8461766   | intergenic | <i>GATA3</i>     | G/A | 0.06 | 0.13 | 5.72 | 9.07E-06 | 9.23E-06 | 0.06 | 0.04 | 0.73 | 0.45        | 2.14 (1.22-3.76)        | 7.84E-03        | +- | <0.05       |
| rs73631896  | 10 | 8461825   | intergenic | <i>GATA3</i>     | C/T | 0.06 | 0.13 | 5.82 | 8.00E-06 | 8.14E-06 | 0.06 | 0.04 | 0.73 | 0.45        | 2.15 (1.23-3.78)        | 7.57E-03        | +- | <0.05       |
| rs113324753 | 11 | 108968987 | intergenic | <i>C11orf87</i>  | G/T | 0.06 | 0.16 | 5.40 | 1.69E-06 | 1.72E-06 | -    | -    | -    | -           | -                       | -               | .. | -           |
| rs12365631  | 11 | 108971949 | intergenic | <i>C11orf87</i>  | G/C | 0.06 | 0.16 | 4.94 | 4.20E-06 | 4.28E-06 | -    | -    | -    | -           | -                       | -               | .. | -           |
| rs80186307  | 11 | 108981862 | intergenic | <i>C11orf87</i>  | G/A | 0.08 | 0.19 | 3.93 | 8.66E-06 | 8.82E-06 | -    | -    | -    | -           | -                       | -               | .. | -           |
| rs4356265   | 11 | 117301818 | intronic   | <i>DSCAML1</i>   | T/C | 0.11 | 0.22 | 3.92 | 1.89E-06 | 1.92E-06 | 0.11 | 0.17 | 1.87 | <b>0.04</b> | <b>2.75 (1.83-4.15)</b> | <b>1.33E-06</b> | ++ | <b>0.08</b> |
| rs11220543  | 11 | 126443837 | intronic   | <i>KIRREL3</i>   | T/C | 0.44 | 0.61 | 2.23 | 7.95E-06 | 8.09E-06 | 0.43 | 0.43 | 0.92 | 0.7         | 1.51 (1.16-1.96)        | 2.35E-03        | +- | <0.05       |
| rs75224498  | 12 | 41527050  | intergenic | <i>PDZRN4</i>    | T/G | 0.04 | 0.12 | 6.70 | 6.92E-06 | 7.04E-06 | 0.05 | 0.08 | 2.25 | 0.06        | 3.91 (2.16-7.09)        | 7.15E-06        | ++ | 0.07        |
| rs11838259  | 12 | 41535464  | intergenic | <i>PDZRN4</i>    | T/G | 0.04 | 0.13 | 7.16 | 2.34E-06 | 2.38E-06 | 0.05 | 0.09 | 2.04 | 0.08        | 3.79 (2.12-6.76)        | 6.44E-06        | ++ | <0.05       |
| rs7990716   | 13 | 74746182  | intergenic | <i>KLF12</i>     | C/T | 0.10 | 0.21 | 3.66 | 7.63E-06 | 7.77E-06 | 0.09 | 0.11 | 0.89 | 0.72        | 1.95 (1.27-2.99)        | 2.17E-03        | +- | <0.05       |
| rs61964594  | 13 | 74746446  | intergenic | <i>KLF12</i>     | G/A | 0.10 | 0.21 | 3.66 | 7.63E-06 | 7.77E-06 | 0.09 | 0.11 | 0.89 | 0.72        | 1.95 (1.27-2.99)        | 2.17E-03        | +- | <0.05       |
| rs726618    | 13 | 74747883  | intergenic | <i>KLF12</i>     | G/T | 0.10 | 0.22 | 4.14 | 1.13E-06 | 1.15E-06 | 0.09 | 0.11 | 0.90 | 0.76        | 2.10 (1.37-3.23)        | 7.02E-04        | +- | <0.05       |
| rs1337043   | 13 | 74748926  | intergenic | <i>KLF12</i>     | C/T | 0.11 | 0.23 | 3.58 | 5.81E-06 | 5.91E-06 | 0.09 | 0.11 | 0.87 | 0.67        | 1.93 (1.27-2.93)        | 2.01E-03        | +- | <0.05       |
| rs1337042   | 13 | 74749071  | intergenic | <i>KLF12</i>     | G/A | 0.11 | 0.23 | 3.58 | 5.81E-06 | 5.91E-06 | 0.09 | 0.11 | 0.87 | 0.67        | 1.93 (1.27-2.93)        | 2.01E-03        | +- | <0.05       |
| rs1337041   | 13 | 74749179  | intergenic | <i>KLF12</i>     | C/A | 0.11 | 0.23 | 3.54 | 6.83E-06 | 6.95E-06 | 0.09 | 0.11 | 0.87 | 0.67        | 1.92 (1.27-2.92)        | 2.17E-03        | +- | <0.05       |
| rs7999569   | 13 | 74750965  | intergenic | <i>KLF12</i>     | C/T | 0.11 | 0.23 | 3.53 | 7.12E-06 | 7.25E-06 | 0.09 | 0.11 | 0.87 | 0.66        | 1.91 (1.26-2.90)        | 2.28E-03        | +- | <0.05       |
| rs2039629   | 13 | 74752497  | intergenic | <i>KLF12</i>     | G/T | 0.11 | 0.23 | 3.53 | 7.12E-06 | 7.25E-06 | 0.09 | 0.11 | 0.87 | 0.66        | 1.91 (1.26-2.90)        | 2.28E-03        | +- | <0.05       |
| rs17062289  | 13 | 74758886  | intergenic | <i>KLF12</i>     | A/C | 0.11 | 0.23 | 3.47 | 8.85E-06 | 9.01E-06 | 0.09 | 0.11 | 0.96 | 0.89        | 1.98 (1.31-3.00)        | 1.30E-03        | +- | <0.05       |
| rs12857591  | 13 | 74801272  | Upstream   | <i>LINC00402</i> | T/C | 0.10 | 0.23 | 4.47 | 2.05E-07 | 2.09E-07 | 0.09 | 0.1  | 0.78 | 0.43        | 2.04 (1.34-3.12)        | 9.61E-04        | +- | <0.05       |
| rs2077879   | 13 | 74806116  | intronic   | <i>LINC00402</i> | T/G | 0.10 | 0.24 | 4.53 | 1.19E-07 | 1.21E-07 | 0.09 | 0.1  | 0.77 | 0.42        | 2.07 (1.36-3.15)        | 7.34E-04        | +- | <0.05       |
| rs7989618   | 13 | 74806494  | intronic   | <i>LINC00402</i> | T/C | 0.10 | 0.23 | 4.47 | 2.05E-07 | 2.09E-07 | 0.09 | 0.1  | 0.78 | 0.43        | 2.04 (1.34-3.12)        | 9.61E-04        | +- | <0.05       |
| rs2777656   | 13 | 74809900  | intronic   | <i>LINC00402</i> | T/C | 0.10 | 0.24 | 4.53 | 1.19E-07 | 1.21E-07 | 0.09 | 0.1  | 0.77 | 0.42        | 2.07 (1.36-3.15)        | 7.34E-04        | +- | <0.05       |
| rs139082553 | 13 | 74813754  | intronic   | <i>LINC00402</i> | G/T | 0.10 | 0.23 | 4.32 | 3.39E-07 | 3.45E-07 | 0.09 | 0.1  | 0.77 | 0.42        | 2.00 (1.31-3.05)        | 1.27E-03        | +- | <0.05       |
| rs61964624  | 13 | 74814176  | intronic   | <i>LINC00402</i> | T/C | 0.10 | 0.23 | 4.47 | 2.05E-07 | 2.09E-07 | 0.09 | 0.1  | 0.78 | 0.43        | 2.04 (1.34-3.12)        | 9.61E-04        | +- | <0.05       |
| rs7332722   | 13 | 74815947  | intronic   | <i>LINC00402</i> | T/C | 0.10 | 0.24 | 4.53 | 1.19E-07 | 1.21E-07 | 0.09 | 0.1  | 0.77 | 0.42        | 2.07 (1.36-3.15)        | 7.34E-04        | +- | <0.05       |
| rs7333089   | 13 | 74815990  | intronic   | <i>LINC00402</i> | C/G | 0.10 | 0.24 | 4.53 | 1.19E-07 | 1.21E-07 | 0.09 | 0.1  | 0.77 | 0.42        | 2.07 (1.36-3.15)        | 7.34E-04        | +- | <0.05       |
| rs6562810   | 13 | 74816423  | intronic   | <i>LINC00402</i> | G/T | 0.10 | 0.24 | 4.69 | 7.05E-08 | 7.18E-08 | 0.09 | 0.1  | 0.78 | 0.43        | 2.11 (1.38-3.21)        | 5.49E-04        | +- | <0.05       |

|                   |    |          |            |           |     |      |      |       |                 |                 |      |      |      |             |                          |                 |    |                 |
|-------------------|----|----------|------------|-----------|-----|------|------|-------|-----------------|-----------------|------|------|------|-------------|--------------------------|-----------------|----|-----------------|
| rs17062427        | 13 | 74827332 | intronic   | LINC00402 | T/C | 0.11 | 0.23 | 3.64  | 3.58E-06        | 3.64E-06        | 0.1  | 0.11 | 0.75 | 0.33        | 1.75 (1.17-2.63)         | 6.63E-03        | +- | <0.05           |
| rs9543552         | 13 | 74844706 | intergenic | LINC00402 | T/C | 0.19 | 0.33 | 2.69  | 7.35E-06        | 7.48E-06        | 0.25 | 0.19 | 0.68 | 0.1         | 1.37 (1.01-1.88)         | 4.53E-02        | +- | <0.05           |
| rs7993042         | 13 | 74854181 | intergenic | LINC00402 | G/A | 0.18 | 0.32 | 2.73  | 8.30E-06        | 8.45E-06        | 0.24 | 0.18 | 0.69 | 0.1         | 1.38 (1.00-1.89)         | 4.85E-02        | +- | <0.05           |
| rs2340984         | 16 | 88799288 | intronic   | PIEZO1    | A/G | 0.17 | 0.30 | 2.87  | 7.75E-06        | 7.89E-06        | 0.22 | 0.21 | 1.14 | 0.59        | 1.81 (1.30-2.51)         | 4.47E-04        | ++ | <0.05           |
| rs112538348       | 17 | 60965309 | intergenic | MARCH10   | A/G | 0.14 | 0.27 | 3.08  | 7.47E-06        | 7.60E-06        | 0.16 | 0.16 | 0.78 | 0.33        | 1.55 (1.09-2.20)         | 1.46E-02        | +- | <0.05           |
| <b>rs76484331</b> | 20 | 62422504 | intronic   | ZBTB46    | A/C | 0.04 | 0.13 | 11.31 | <b>2.49E-08</b> | <b>2.53E-08</b> | 0.05 | 0.08 | 2.97 | <b>0.01</b> | <b>5.84 (3.16-10.76)</b> | <b>1.61E-08</b> | ++ | <b>&lt;0.05</b> |
| rs2180631         | 20 | 62426393 | intronic   | ZBTB46    | T/C | 0.05 | 0.13 | 5.98  | 7.21E-06        | 7.34E-06        | 0.05 | 0.09 | 2.76 | <b>0.02</b> | <b>4.17 (2.34-7.41)</b>  | <b>1.18E-06</b> | ++ | <b>0.19</b>     |
| rs75004420        | 20 | 62427703 | intronic   | ZBTB46    | A/G | 0.05 | 0.13 | 7.82  | 6.13E-07        | 6.24E-07        | 0.05 | 0.09 | 2.55 | <b>0.03</b> | <b>4.50 (2.52-8.04)</b>  | <b>3.90E-07</b> | ++ | <b>0.06</b>     |
| rs139848472       | 20 | 62430476 | intronic   | ZBTB46    | A/C | 0.05 | 0.13 | 7.82  | 6.13E-07        | 6.24E-07        | 0.05 | 0.09 | 2.55 | <b>0.03</b> | <b>4.50 (2.52-8.04)</b>  | <b>3.90E-07</b> | ++ | <b>0.06</b>     |
| rs141335934       | 20 | 62437525 | intronic   | ZBTB46    | T/C | 0.06 | 0.14 | 5.61  | 6.05E-06        | 6.16E-06        | 0.07 | 0.09 | 1.43 | 0.33        | 2.76 (1.64-4.65)         | 1.41E-04        | ++ | <0.05           |
| rs6010663         | 20 | 62441298 | intronic   | ZBTB46    | G/C | 0.05 | 0.14 | 5.67  | 6.28E-06        | 6.39E-06        | 0.05 | 0.09 | 2.48 | <b>0.03</b> | <b>3.88 (2.22-6.78)</b>  | <b>1.96E-06</b> | ++ | <b>0.15</b>     |
| rs6010665         | 20 | 62441600 | intronic   | ZBTB46    | C/T | 0.05 | 0.14 | 5.67  | 6.28E-06        | 6.39E-06        | 0.05 | 0.09 | 2.50 | <b>0.03</b> | <b>3.89 (2.23-6.81)</b>  | <b>1.86E-06</b> | ++ | <b>0.15</b>     |
| rs113033986       | 20 | 62442559 | intronic   | ZBTB46    | A/G | 0.05 | 0.14 | 5.67  | 6.28E-06        | 6.39E-06        | 0.05 | 0.09 | 2.50 | <b>0.03</b> | <b>3.89 (2.23-6.81)</b>  | <b>1.86E-06</b> | ++ | <b>0.15</b>     |
| rs1887407         | 20 | 62446569 | intronic   | ZBTB46    | A/G | 0.05 | 0.14 | 5.67  | 6.28E-06        | 6.39E-06        | 0.05 | 0.09 | 2.50 | <b>0.03</b> | <b>3.89 (2.23-6.81)</b>  | <b>1.86E-06</b> | ++ | <b>0.15</b>     |
| rs117861539       | 20 | 62447063 | intronic   | ZBTB46    | T/G | 0.05 | 0.13 | 7.67  | 6.99E-07        | 7.12E-07        | 0.05 | 0.09 | 2.57 | <b>0.03</b> | <b>4.49 (2.51-8.01)</b>  | <b>3.94E-07</b> | ++ | <b>0.06</b>     |
| rs4578911         | 20 | 62448938 | intronic   | ZBTB46    | G/A | 0.05 | 0.14 | 5.70  | 6.04E-06        | 6.15E-06        | 0.05 | 0.09 | 2.50 | <b>0.03</b> | <b>3.90 (2.23-6.82)</b>  | <b>1.81E-06</b> | ++ | <b>0.15</b>     |
| rs6011153         | 20 | 62450502 | intronic   | ZBTB46    | C/G | 0.05 | 0.14 | 5.70  | 6.04E-06        | 6.15E-06        | 0.05 | 0.09 | 2.53 | <b>0.03</b> | <b>3.92 (2.24-6.86)</b>  | <b>1.68E-06</b> | ++ | <b>0.16</b>     |
| rs61653788        | 20 | 62454706 | intronic   | ZBTB46    | G/C | 0.05 | 0.14 | 5.70  | 6.04E-06        | 6.15E-06        | 0.05 | 0.09 | 2.50 | <b>0.03</b> | <b>3.90 (2.23-6.82)</b>  | <b>1.81E-06</b> | ++ | <b>0.15</b>     |
| rs116870978       | 20 | 62455923 | intronic   | ZBTB46    | A/G | 0.04 | 0.13 | 7.70  | 6.71E-07        | 6.83E-07        | 0.05 | 0.09 | 2.57 | <b>0.03</b> | <b>4.50 (2.52-8.03)</b>  | <b>3.84E-07</b> | ++ | <b>0.06</b>     |
| rs73325349        | 20 | 62456913 | intronic   | ZBTB46    | C/T | 0.05 | 0.14 | 5.70  | 6.04E-06        | 6.15E-06        | 0.05 | 0.09 | 2.50 | <b>0.03</b> | <b>3.90 (2.23-6.82)</b>  | <b>1.81E-06</b> | ++ | <b>0.15</b>     |
| rs6010673         | 20 | 62459863 | intronic   | ZBTB46    | T/A | 0.05 | 0.14 | 5.61  | 6.97E-06        | 7.10E-06        | 0.05 | 0.09 | 2.50 | <b>0.03</b> | <b>3.87 (2.22-6.77)</b>  | <b>2.00E-06</b> | ++ | <b>0.16</b>     |
| rs6011174         | 20 | 62463347 | Upstream   | ZBTB46    | G/A | 0.05 | 0.14 | 5.70  | 6.04E-06        | 6.15E-06        | 0.05 | 0.09 | 2.50 | <b>0.03</b> | <b>3.90 (2.23-6.82)</b>  | <b>1.81E-06</b> | ++ | <b>0.15</b>     |
| rs6011175         | 20 | 62463515 | Upstream   | ZBTB46    | G/C | 0.05 | 0.14 | 5.70  | 6.04E-06        | 6.15E-06        | 0.05 | 0.09 | 2.50 | <b>0.03</b> | <b>3.90 (2.23-6.82)</b>  | <b>1.81E-06</b> | ++ | <b>0.15</b>     |
| rs6010674         | 20 | 62463591 | Upstream   | ZBTB46    | T/C | 0.05 | 0.14 | 5.70  | 6.04E-06        | 6.15E-06        | 0.05 | 0.09 | 2.50 | <b>0.03</b> | <b>3.90 (2.23-6.82)</b>  | <b>1.81E-06</b> | ++ | <b>0.15</b>     |
| rs7344617         | 20 | 62463858 | Upstream   | ZBTB46    | C/G | 0.05 | 0.14 | 5.70  | 6.04E-06        | 6.15E-06        | 0.05 | 0.09 | 2.50 | <b>0.03</b> | <b>3.90 (2.23-6.82)</b>  | <b>1.81E-06</b> | ++ | <b>0.15</b>     |
| rs6011176         | 20 | 62464735 | Upstream   | ZBTB46    | C/G | 0.05 | 0.14 | 5.70  | 6.04E-06        | 6.15E-06        | 0.05 | 0.09 | 2.50 | <b>0.03</b> | <b>3.90 (2.23-6.82)</b>  | <b>1.81E-06</b> | ++ | <b>0.15</b>     |
| rs60022917        | 20 | 62465663 | Upstream   | ZBTB46    | A/G | 0.05 | 0.14 | 5.70  | 6.04E-06        | 6.15E-06        | 0.05 | 0.09 | 2.50 | <b>0.03</b> | <b>3.90 (2.23-6.82)</b>  | <b>1.81E-06</b> | ++ | <b>0.15</b>     |
| rs6011178         | 20 | 62468374 | Upstream   | ZBTB46    | G/C | 0.05 | 0.14 | 5.70  | 6.04E-06        | 6.15E-06        | 0.05 | 0.09 | 2.50 | <b>0.03</b> | <b>3.90 (2.23-6.82)</b>  | <b>1.81E-06</b> | ++ | <b>0.15</b>     |

|                    |    |          |            |           |     |      |      |       |          |          |      |      |      |      |                   |          |    |      |
|--------------------|----|----------|------------|-----------|-----|------|------|-------|----------|----------|------|------|------|------|-------------------|----------|----|------|
| rs79873740         | 20 | 62468531 | Upstream   | ZBTB46    | T/C | 0.05 | 0.14 | 5.49  | 8.40E-06 | 8.55E-06 | 0.05 | 0.09 | 2.50 | 0.03 | 3.83 (2.20-6.69)  | 2.28E-06 | ++ | 0.17 |
| rs8115050          | 20 | 62469865 | intergenic | C20orf181 | A/G | 0.05 | 0.14 | 5.62  | 6.86E-06 | 6.98E-06 | 0.05 | 0.09 | 2.52 | 0.03 | 3.89 (2.22-6.80)  | 1.88E-06 | ++ | 0.16 |
| <b>rs144908555</b> | 20 | 62469956 | intergenic | C20orf181 | A/G | 0.04 | 0.13 | 10.43 | 5.26E-08 | 5.35E-08 | 0.05 | 0.09 | 3.13 | 0.01 | 5.81 (3.15-10.68) | 1.61E-08 | ++ | 0.05 |
| rs11905851         | 20 | 62470849 | intergenic | C20orf181 | T/C | 0.05 | 0.13 | 6.08  | 6.27E-06 | 6.38E-06 | 0.05 | 0.09 | 3.05 | 0.01 | 4.44 (2.48-7.97)  | 5.66E-07 | ++ | 0.25 |
| rs11908253         | 20 | 62470851 | intergenic | C20orf181 | C/T | 0.05 | 0.13 | 6.08  | 6.27E-06 | 6.38E-06 | 0.05 | 0.09 | 3.05 | 0.01 | 4.44 (2.48-7.97)  | 5.66E-07 | ++ | 0.25 |
| rs11905798         | 20 | 62471198 | intergenic | C20orf181 | A/G | 0.05 | 0.13 | 6.08  | 6.27E-06 | 6.38E-06 | 0.05 | 0.09 | 2.90 | 0.02 | 4.33 (2.42-7.75)  | 7.99E-07 | ++ | 0.21 |
| rs11905801         | 20 | 62471233 | intergenic | C20orf181 | A/G | 0.05 | 0.13 | 6.08  | 6.27E-06 | 6.38E-06 | 0.05 | 0.09 | 2.90 | 0.02 | 4.33 (2.42-7.75)  | 7.99E-07 | ++ | 0.21 |
| rs6011179          | 20 | 62471797 | intergenic | C20orf181 | A/T | 0.05 | 0.14 | 5.61  | 6.91E-06 | 7.03E-06 | 0.05 | 0.09 | 2.59 | 0.03 | 3.96 (2.26-6.96)  | 1.63E-06 | ++ | 0.18 |
| rs6011180          | 20 | 62471908 | intergenic | C20orf181 | A/C | 0.05 | 0.14 | 5.61  | 6.91E-06 | 7.03E-06 | 0.05 | 0.09 | 2.59 | 0.03 | 3.96 (2.26-6.96)  | 1.63E-06 | ++ | 0.18 |
| rs112821795        | 20 | 62473116 | intergenic | C20orf181 | C/T | 0.05 | 0.14 | 5.61  | 6.91E-06 | 7.03E-06 | 0.05 | 0.09 | 2.59 | 0.03 | 3.96 (2.26-6.96)  | 1.63E-06 | ++ | 0.18 |
| rs6010678          | 20 | 62473876 | intergenic | C20orf181 | C/G | 0.05 | 0.14 | 5.61  | 6.91E-06 | 7.03E-06 | 0.05 | 0.09 | 2.59 | 0.03 | 3.96 (2.26-6.96)  | 1.63E-06 | ++ | 0.18 |
| rs8121155          | 20 | 62474185 | intergenic | C20orf181 | C/T | 0.05 | 0.14 | 5.61  | 6.91E-06 | 7.03E-06 | 0.05 | 0.09 | 2.59 | 0.03 | 3.96 (2.26-6.96)  | 1.63E-06 | ++ | 0.18 |
| rs6010681          | 20 | 62474360 | intergenic | C20orf181 | A/G | 0.05 | 0.14 | 5.61  | 6.91E-06 | 7.03E-06 | 0.05 | 0.09 | 2.59 | 0.03 | 3.96 (2.26-6.96)  | 1.63E-06 | ++ | 0.18 |
| rs6011183          | 20 | 62474640 | intergenic | C20orf181 | T/C | 0.05 | 0.14 | 5.61  | 6.91E-06 | 7.03E-06 | 0.05 | 0.09 | 2.59 | 0.03 | 3.96 (2.26-6.96)  | 1.63E-06 | ++ | 0.18 |
| rs73325392         | 20 | 62475297 | intergenic | C20orf181 | C/A | 0.05 | 0.14 | 5.61  | 6.91E-06 | 7.03E-06 | 0.05 | 0.09 | 2.59 | 0.03 | 3.96 (2.26-6.96)  | 1.63E-06 | ++ | 0.18 |
| rs73325395         | 20 | 62475451 | intergenic | C20orf181 | A/G | 0.05 | 0.14 | 5.61  | 6.91E-06 | 7.03E-06 | 0.05 | 0.09 | 2.59 | 0.03 | 3.96 (2.26-6.96)  | 1.63E-06 | ++ | 0.18 |
| rs6010682          | 20 | 62476548 | intergenic | C20orf181 | G/A | 0.05 | 0.14 | 5.61  | 6.91E-06 | 7.03E-06 | 0.05 | 0.09 | 2.59 | 0.03 | 3.96 (2.26-6.96)  | 1.63E-06 | ++ | 0.18 |
| rs6010683          | 20 | 62476633 | intergenic | C20orf181 | T/C | 0.05 | 0.14 | 5.91  | 4.34E-06 | 4.42E-06 | 0.05 | 0.09 | 2.35 | 0.04 | 3.85 (2.20-6.75)  | 2.40E-06 | ++ | 0.11 |
| rs200210223        | 20 | 62478452 | intergenic | C20orf181 | C/G | 0.05 | 0.13 | 7.33  | 1.05E-06 | 1.07E-06 | 0.05 | 0.09 | 3.10 | 0.01 | 4.97 (2.74-9.04)  | 1.45E-07 | ++ | 0.16 |
| rs561090005        | 20 | 62478456 | intergenic | C20orf181 | G/C | 0.05 | 0.13 | 7.33  | 1.05E-06 | 1.07E-06 | 0.05 | 0.09 | 3.10 | 0.01 | 4.97 (2.74-9.04)  | 1.45E-07 | ++ | 0.16 |
| rs111874365        | 20 | 62478517 | intergenic | C20orf181 | G/A | 0.05 | 0.14 | 5.81  | 5.04E-06 | 5.13E-06 | 0.05 | 0.09 | 2.59 | 0.03 | 4.03 (2.29-7.09)  | 1.30E-06 | ++ | 0.16 |

SNP: Single nucleotide polymorphism. CHR: Chromosome. bp: Base pair. EA: Effect allele. NEA: Non-effect allele. EAF: Effect allele frequency. OR: Odds-ratio. (95%CI): 95% Confidence Interval. GC: Genomic Control. Dir: Effect Direction. Het: Heterogeneity.

SNPs with p-value <1x10<sup>-5</sup> in the discovery stage are presented. Alleles and chromosomal positions were identified on basis of 1000 Genome Project Phase 3. Location were described following ANNOVAR system.

Genetic variants: rs113324753, rs12365631, rs80186307 failed imputation quality controls in the replication cohort.

**Online Table IV.** Independent SNPs leading the most significant associations with PH in the meta-analysis. Extra columns for the complementary analysis including CE as covariate in the replication. SNP: Single nucleotide polymorphism. CHR: Chromosome. bp: Base pair. EA: Effect allele. NEA: Non-effect allele. EAF: Effect allele frequency. N. Variants: Number of variants reaching  $p > 1 \times 10^{-5}$ , OR: Odds-ratio. (95% CI): 95% Confidence Interval. C.A.: Complementary Analysis adding CE as covariate.

| SNP               | CHR       | Position (bp)   | Gene                 | EA/NEA     | EAF        | Stage                | OR (95%CI)                | p                            | OR (95%CI) - C.A.        | p - C.A.                    |
|-------------------|-----------|-----------------|----------------------|------------|------------|----------------------|---------------------------|------------------------------|--------------------------|-----------------------------|
| rs77557904        | 2         | 1047076         | <i>SNTG2</i>         | G/C        | 0.06       | Meta-analysis        | 3.82 (2.19-6.68)          | 2.43x10 <sup>-6</sup>        | 3.88 (2.21-6.80)         | 2.18x10 <sup>-6</sup>       |
|                   |           |                 |                      |            |            | Discovery            | 6.56 (3.10-13.89)         | 8.62x10 <sup>-7</sup>        | -                        | -                           |
|                   |           |                 |                      |            |            | Replication          | 2.01 (0.88-4.59)          | 0.1                          | 2.04 (0.88-4.71)         | 0.09                        |
| rs112541215       | 2         | 218916291       | <i>RUFY4</i>         | A/T        | 0.08       | Meta-analysis        | 3.01 (1.88-4.84)          | 4.79x10 <sup>-6</sup> §      | 3.11 (1.92-5.04)         | 4.10x10 <sup>-6</sup>       |
|                   |           |                 |                      |            |            | Discovery            | 4.67 (2.43-8.96)          | 3.76x10 <sup>-6</sup>        | -                        | -                           |
|                   |           |                 |                      |            |            | Replication          | 1.90 (0.96-3.74)          | 0.07                         | 1.94 (0.96-3.95)         | 0.07                        |
| rs1962779         | 7         | 83837734        | <i>SEMA3A</i>        | C/G        | 0.19       | Meta-analysis        | 2.43 (1.76-3.37)          | 7.85x10 <sup>-8</sup> §      | 2.34 (1.69-3.25)         | 3.33x10 <sup>-7</sup>       |
|                   |           |                 |                      |            |            | Discovery            | 2.94 (1.87-4.61)          | 2.77x10 <sup>-6</sup>        | -                        | -                           |
|                   |           |                 |                      |            |            | Replication          | 2.00 (1.26-3.18)          | 3.34x10 <sup>-3</sup>        | 1.84 (1.15-2.94)         | 0.01                        |
| rs4356265         | 11        | 117301818       | <i>DSCAML1</i>       | T/C        | 0.11       | Meta-analysis        | 2.75 (1.83-4.15)          | 1.33x10 <sup>-6</sup> §      | 2.62 (1.74-3.94)         | 4.30x10 <sup>-6</sup>       |
|                   |           |                 |                      |            |            | Discovery            | 3.92 (2.23-6.88)          | 1.89x10 <sup>-6</sup>        | -                        | -                           |
|                   |           |                 |                      |            |            | Replication          | 1.87 (1.03-3.38)          | 0.04                         | 1.68 (0.93-3.04)         | 0.09                        |
| rs564865745       | 12        | 41626444        | <i>PDZRN4</i>        | G/A        | 0.05       | Meta-analysis        | 4.23 (2.37-7.54)          | 1.03x10 <sup>-6</sup>        | 4.08 (2.29-7.24)         | 1.67x10 <sup>-6</sup>       |
|                   |           |                 |                      |            |            | Discovery            | 9.89 (4.20-23.28)         | 1.56x10 <sup>-7</sup>        | -                        | -                           |
|                   |           |                 |                      |            |            | Replication          | 2.12 (0.97-4.62)          | 0.06                         | 2.02 (0.93-4.35)         | 0.07                        |
| <b>rs76484331</b> | <b>20</b> | <b>62422504</b> | <b><i>ZBTB46</i></b> | <b>A/C</b> | <b>0.1</b> | <b>Meta-analysis</b> | <b>5.84 (3.16-10.76)</b>  | <b>1.61x10<sup>-8</sup>*</b> | <b>5.96 (3.22-11.05)</b> | <b>1.43x10<sup>-8</sup></b> |
|                   |           |                 |                      |            |            | <b>Discovery</b>     | <b>11.31 (4.82-26.55)</b> | <b>2.49x10<sup>-8</sup>*</b> | -                        | -                           |
| <b>rs76484331</b> | <b>20</b> | <b>62422504</b> | <b><i>ZBTB46</i></b> | <b>A/C</b> | <b>0.1</b> | Replication          | 2.97 (1.24-7.09)          | 0.01                         | 3.03 (1.25-7.34)         | 0.01                        |

**Online Table V.** Genes associated with PH through a gene-set analysis.

| CHR | Start     | Stop      | Gene             | p         | zstat |
|-----|-----------|-----------|------------------|-----------|-------|
| 20  | 62472779  | 62477273  | <i>C20orf181</i> | 8.98E-07* | 4.78  |
| 20  | 62524518  | 62569384  | <i>DNAJC5</i>    | 1.79E-05  | 4.13  |
| 21  | 33041346  | 33106388  | <i>SCAF4</i>     | 3.30E-05  | 3.99  |
| 9   | 123968072 | 124097121 | <i>GSN</i>       | 5.67E-05  | 3.86  |
| 11  | 3846208   | 3864213   | <i>RHOG</i>      | 7.45E-05  | 3.79  |
| 16  | 90069273  | 90088536  | <i>DBNDD1</i>    | 1.64E-04  | 3.59  |
| 20  | 62494596  | 62524898  | <i>TPD52L2</i>   | 2.22E-04  | 3.51  |
| 2   | 76972845  | 77822445  | <i>LRRTM4</i>    | 2.36E-04  | 3.50  |
| 2   | 137521115 | 138437287 | <i>THSD7B</i>    | 2.89E-04  | 3.44  |
| 16  | 58057470  | 58082805  | <i>MMP15</i>     | 3.49E-04  | 3.39  |
| 13  | 23900965  | 24009841  | <i>SACS</i>      | 3.51E-04  | 3.39  |
| 19  | 39831036  | 39878350  | <i>SAMD4B</i>    | 3.67E-04  | 3.38  |
| 1   | 234038679 | 234462262 | <i>SLC35F3</i>   | 5.53E-04  | 3.26  |
| 7   | 2391721   | 2422380   | <i>EIF3B</i>     | 5.82E-04  | 3.25  |
| 11  | 33058963  | 33129489  | <i>TCP11L1</i>   | 6.22E-04  | 3.23  |
| 11  | 68520088  | 68613878  | <i>CPT1A</i>     | 6.39E-04  | 3.22  |
| 11  | 33035410  | 33057128  | <i>DEPDC7</i>    | 6.99E-04  | 3.19  |
| 20  | 2819349   | 2849378   | <i>VPS16</i>     | 7.21E-04  | 3.19  |
| 17  | 61970275  | 61976021  | <i>CSH1</i>      | 7.59E-04  | 3.17  |
| 4   | 1339054   | 1383837   | <i>UVSSA</i>     | 8.11E-04  | 3.15  |
| 16  | 88779751  | 88853619  | <i>PIEZO1</i>    | 8.16E-04  | 3.15  |
| 4   | 1158720   | 1204750   | <i>SPON2</i>     | 8.20E-04  | 3.15  |
| 17  | 61947372  | 61953126  | <i>CSH2</i>      | 9.20E-04  | 3.12  |

CHR: Chromosome; Start/Stop: start and end position of the genomic region of interest (hg19); zstat: p-value converted to Z-value.

Only genes with a p-value <0.001 are shown

\*p-value <2.68x10<sup>-6</sup> (0.05/18647 protein coding genes)

**Online Table VI.** S-Multixcan results. N: Number of SNPs as eQTLs in GTEx. N indep: Number of independent SNPs considered by S-MultiXcan. sd: Standard deviation.

| Gene                      | Gene Symbol          | P-value         | N  | N indep | Z mean | Z sd |
|---------------------------|----------------------|-----------------|----|---------|--------|------|
| ENSG00000227088.1         | <i>AC084149.2</i>    | 3.81E-05        | 6  | 4       | -1.61  | 1.55 |
| ENSG00000165966.14        | <i>PDZRN4</i>        | 1.53E-04        | 46 | 8       | 0.02   | 1.36 |
| ENSG00000235532.1         | <i>LINC00402</i>     | 2.07E-04        | 9  | 3       | 2.9    | 1.49 |
| ENSG00000173575.20        | <i>CHD2</i>          | 2.14E-04        | 45 | 5       | 0.94   | 1.31 |
| <b>ENSG00000130584.10</b> | <b><i>ZBTB46</i></b> | <b>3.16E-04</b> | 29 | 6       | -1.14  | 1.83 |
| ENSG00000179862.6         | <i>CITED4</i>        | 3.32E-04        | 42 | 8       | 0.44   | 1.86 |
| ENSG00000156508.17        | <i>EEF1A1</i>        | 4.61E-04        | 6  | 3       | -0.29  | 2.75 |
| ENSG00000156304.14        | <i>SCAF4</i>         | 4.88E-04        | 47 | 1       | 3.37   | 0.61 |
| ENSG00000178997.11        | <i>EXD1</i>          | 4.96E-04        | 2  | 2       | -2.99  | 0.69 |
| ENSG00000204179.10        | <i>PTPN20</i>        | 5.42E-04        | 13 | 5       | 0.22   | 1.12 |

**Online Table VII.** GNOVA genetic correlation results for ischemic stroke phenotypes, intracranial hemorrhage, and parenchymal hematoma. AIS: All Ischemic Stroke; LAS: Large Artery-Atherosclerosis Stroke; CES: Cardioembolic Stroke; SVS: Small Vessel Stroke; ICH: Intracranial Hemorrhage; WMHv: White matter hyperintensity volume.

| <b>Phenotype</b> | <b>Rho</b> | <b>SE</b> | <b>P value</b>               |
|------------------|------------|-----------|------------------------------|
| AIS              | -0.008     | 0.005     | 0.14                         |
| LAS              | -0.009     | 0.006     | 0.11                         |
| CES              | -0.004     | 0.006     | 0.45                         |
| SVS              | -0.001     | 0.005     | 0.84                         |
| ICH              | -0.042     | 0.045     | 0.34                         |
| <b>deepICH</b>   | 0.141      | 0.052     | <b>6.7 x 10<sup>-3</sup></b> |
| <b>lobarICH</b>  | -0.179     | 0.054     | <b>8.6 x 10<sup>-4</sup></b> |
| <b>WMHv</b>      | 0.081      | 0.031     | <b>9.2 x 10<sup>-3</sup></b> |



**Online Table VIII.** Description of poor outcome phenotypes in the replication cohort.

|                                     | <b>Replication cohort (n = 580)</b> |
|-------------------------------------|-------------------------------------|
| <b>Disability (%)</b>               | 183 (40.9)                          |
| <b>Mortality after 3 months (%)</b> | 61 (13.6)                           |
| <b>In-Hospital mortality (%)</b>    | 24 (5.4)                            |

**Online Table IX.** Results of the PRS in the replication cohort. Welch Two Sample t-test of PRS best-fit threshold for disability after three months and Parenchymal Hematoma, Mortality after 3 months and In-Hospital mortality in the replication cohort.

|                                  | <b>T-value</b> | <b>Standard Error</b> | <b>P-value</b>        |
|----------------------------------|----------------|-----------------------|-----------------------|
| <b>Disability after 3 months</b> | 4.89           | 4.13x10 <sup>-4</sup> | 1.51x10 <sup>-6</sup> |
| <b>Parenchymal Hematoma</b>      | 2.02           | 5.80x10 <sup>-4</sup> | 0.046                 |
| <b>Mortality after 3 months</b>  | 3.20           | 6.55x10 <sup>-4</sup> | 0.002                 |
| <b>In-Hospital mortality</b>     | 1.05           | 1.19x10 <sup>-3</sup> | 0.304                 |

**Online Table X.** Multivariable logistic regression results for disability after three months.

|                     | <b>Estimate</b> | <b>Standard Error</b> | <b>Z value</b> | <b>P value</b> |
|---------------------|-----------------|-----------------------|----------------|----------------|
| (Intercept)         | 18.91           | 10.14                 | 1.86           | 6.22E-02       |
| <b>PRS</b>          | 68.56           | 27.46                 | 2.50           | 1.25E-02       |
| <b>NIHSS</b>        | 0.19            | 0.02                  | 8.75           | 2.19E-18       |
| <b>Age</b>          | 0.05            | 0.01                  | 4.36           | 1.32E-05       |
| <b>Sex (Female)</b> | 0.21            | 0.24                  | 0.87           | 3.83E-01       |

**Online Table XI.** Expression quantitative trait loci for rs76484331 over *ZBTB46* expression.

| <b>Tissue</b>                     | <b>p</b> | <b>Source</b>             |
|-----------------------------------|----------|---------------------------|
| Blood                             | 2.2E-06  | eQTLGen Consortium        |
| Esophagus – Mucosa                | 0.00003  | GTEEx Analysis Release V7 |
| Artery - Tibial                   | 0.029    | GTEEx Analysis Release V7 |
| Artery - Aorta                    | 0.088    | GTEEx Analysis Release V7 |
| Brain - Amygdala                  | 0.21     | GTEEx Analysis Release V7 |
| Brain - Hippocampus               | 0.46     | GTEEx Analysis Release V7 |
| Brain - Frontal Cortex            | 0.54     | GTEEx Analysis Release V7 |
| Brain - Anterior cingulate cortex | 0.61     | GTEEx Analysis Release V7 |
| Brain - Hypothalamus              | 0.64     | GTEEx Analysis Release V7 |
| Brain - Nucleus accumbens         | 0.66     | GTEEx Analysis Release V7 |
| Artery - Coronary                 | 0.66     | GTEEx Analysis Release V7 |
| Whole Blood                       | 0.68     | GTEEx Analysis Release V7 |
| Brain - Substantia nigra          | 0.69     | GTEEx Analysis Release V7 |
| Brain - Caudate (basal ganglia)   | 0.7      | GTEEx Analysis Release V7 |
| Brain - Cerebellar Hemisphere     | 0.74     | GTEEx Analysis Release V7 |
| Brain - Putamen (basal ganglia)   | 0.8      | GTEEx Analysis Release V7 |
| Brain - Cerebellum                | 0.85     | GTEEx Analysis Release V7 |
| Brain - Cortex                    | 0.86     | GTEEx Analysis Release V7 |

**Online Table XII.** Histone modifications reported for rs76484331.

| <b>Location</b>          | <b>Chromatin State</b> | <b>Tissue Group</b> | <b>Tissue</b>                                                  |
|--------------------------|------------------------|---------------------|----------------------------------------------------------------|
| chr20:62422400..62423800 | Enhancers              | Heart               | Right Ventricle                                                |
| chr20:62414400..62429600 | Quiescent/Low          | Blood & T-cell      | Primary mononuclear cells from peripheral blood                |
| chr20:62414200..62431400 | Quiescent/Low          | Blood & T-cell      | Primary T CD8+ memory cells from peripheral blood              |
| chr20:62414200..62426800 | Quiescent/Low          | Blood & T-cell      | Primary T CD8+ naive cells from peripheral blood               |
| chr20:62414000..62455400 | Quiescent/Low          | Blood & T-cell      | Primary T cells effector/memory enriched from peripheral blood |
| chr20:62414000..62425200 | Quiescent/Low          | Blood & T-cell      | Primary T cells from cord blood                                |
| chr20:62414200..62433800 | Quiescent/Low          | Blood & T-cell      | Primary T helper cells PMA-I stimulated                        |
| chr20:62417800..62427000 | Quiescent/Low          | Blood & T-cell      | Primary T helper memory cells from peripheral blood 1          |
| chr20:62417600..62452600 | Quiescent/Low          | Blood & T-cell      | Primary T helper memory cells from peripheral blood 2          |
| chr20:62414200..62432000 | Quiescent/Low          | Blood & T-cell      | Primary T helper naive cells from peripheral blood             |
| chr20:62414200..62424600 | Quiescent/Low          | Blood & T-cell      | Primary T helper naive cells from peripheral blood             |
| chr20:62418000..62435000 | Quiescent/Low          | ENCODE              | GM12878 Lymphoblastoid Cell Line                               |
| chr20:62408600..62433800 | Quiescent/Low          | ENCODE              | Monocytes-CD14+ RO01746 Primary Cells                          |
| chr20:62418600..62434200 | Quiescent/Low          | HSC & B-cell        | Primary B cells from cord blood                                |
| chr20:62418000..62426000 | Quiescent/Low          | HSC & B-cell        | Primary B cells from peripheral blood                          |
| chr20:62375800..62432400 | Quiescent/Low          | HSC & B-cell        | Primary monocytes from peripheral blood                        |
| chr20:62414200..62434400 | Quiescent/Low          | HSC & B-cell        | Primary Natural Killer cells from peripheral blood             |

**Online Table VI (continued)**

|                          |                         |                |                                                  |
|--------------------------|-------------------------|----------------|--------------------------------------------------|
| chr20:62419200..62423600 | Repressed PolyComb      | Blood & T-cell | Primary T cells from peripheral blood            |
| chr20:62421000..62435000 | Weak Repressed PolyComb | Blood & T-cell | Primary T helper 17 cells PMA-I stimulated       |
| chr20:62415200..62437800 | Weak Repressed PolyComb | Blood & T-cell | Primary T helper cells from peripheral blood     |
| chr20:62417800..62432400 | Weak Repressed PolyComb | Blood & T-cell | Primary T regulatory cells from peripheral blood |
| chr20:62421600..62427200 | Weak Repressed PolyComb | HSC & B-cell   | Primary neutrophils from peripheral blood        |
| chr20:62422000..62442600 | Weak transcription      | Brain          | Brain Angular Gyrus                              |
| chr20:62422400..62460000 | Weak transcription      | Brain          | Brain Anterior Caudate                           |
| chr20:62422000..62457400 | Weak transcription      | Brain          | Brain Cingulate Gyrus                            |
| chr20:62422000..62442800 | Weak transcription      | Brain          | Brain Dorsolateral Prefrontal Cortex             |
| chr20:62421600..62422600 | Weak transcription      | Brain          | Brain Germinal Matrix                            |
| chr20:62421600..62452600 | Weak transcription      | Brain          | Brain Hippocampus Middle                         |
| chr20:62421800..62423600 | Weak transcription      | Brain          | Brain Inferior Temporal Lobe                     |
| chr20:62422200..62424000 | Weak transcription      | Brain          | Brain Substantia Nigra                           |
| chr20:62422200..62424200 | Weak transcription      | ES-deriv       | H1 Derived Neuronal Progenitor Cultured Cells    |
| chr20:62422400..62426200 | Weak transcription      | ES-deriv       | H9 Derived Neuron Cultured Cells                 |
| chr20:62422400..62423000 | Weak transcription      | ES-deriv       | H9 Derived Neuronal Progenitor Cultured Cells    |
| chr20:62422200..62440600 | Weak transcription      | Heart          | Aorta                                            |
| chr20:62421200..62423400 | Weak transcription      | Heart          | Right Atrium                                     |
| chr20:62407000..62434000 | Weak transcription      | HSC & B-cell   | Primary hematopoietic stem cells                 |

**Online Table VI (continued)**

|                          |                    |              |                                                         |
|--------------------------|--------------------|--------------|---------------------------------------------------------|
| chr20:62422000..62427200 | Weak transcription | HSC & B-cell | Primary hematopoietic stem cells G-CSF-mobilized Female |
| chr20:62422200..62427200 | Weak transcription | HSC & B-cell | Primary hematopoietic stem cells G-CSF-mobilized Male   |
| chr20:62422000..62434200 | Weak transcription | HSC & B-cell | Primary hematopoietic stem cells short term culture     |

**Online Table XIII.** Expression quantitative trait loci for rs76484331 and cis-genes.

| <b>Gene Symbol</b> | <b>Tissue</b>      | <b>P</b> | <b>Source</b>            |
|--------------------|--------------------|----------|--------------------------|
| <i>ZGPAT</i>       | Blood              | 3.47E-52 | eQTLGen Consortium       |
| <i>UCKL1</i>       | Blood              | 3.29E-39 | eQTLGen Consortium       |
| <i>DNAJC5</i>      | Blood              | 1.46E-11 | eQTLGen Consortium       |
| <i>SLC2A4RG</i>    | Blood              | 2.46E-10 | eQTLGen Consortium       |
| <i>LIME1</i>       | Lung               | 1.30E-09 | GTEx Analysis Release V7 |
| <i>LIME1</i>       | Thyroid            | 6.00E-09 | GTEx Analysis Release V7 |
| <i>EEF1A2</i>      | Blood              | 2.39E-08 | eQTLGen Consortium       |
| <i>LIME1</i>       | Artery - Tibial    | 3.10E-08 | GTEx Analysis Release V7 |
| <i>LIME1</i>       | Nerve - Tibial     | 7.60E-08 | GTEx Analysis Release V7 |
| <i>LIME1</i>       | Testis             | 2.40E-06 | GTEx Analysis Release V7 |
| <i>LIME1</i>       | Pituitary          | 7.20E-06 | GTEx Analysis Release V7 |
| <i>LIME1</i>       | Artery - Aorta     | 0.002    | GTEx Analysis Release V7 |
| <i>LIME1</i>       | Brain - Cerebellum | 0.0026   | GTEx Analysis Release V7 |
| <i>LIME1</i>       | Whole Blood        | 0.05     | GTEx Analysis Release V7 |

Only expression quantitative trait loci with p-value <0.05 are shown.



**Online Table XIV.** Phenotype associations of rs76484331.

| <b>Trait</b>                                                        | <b>P</b> | <b>Source</b>                        |
|---------------------------------------------------------------------|----------|--------------------------------------|
| Impedance of arm right                                              | 1.61E-09 | PhenoScanner - Neale-B_UKBB_EUR_2017 |
| Impedance of arm left                                               | 1.31E-08 | PhenoScanner - Neale-B_UKBB_EUR_2017 |
| Impedance of whole body                                             | 3.18E-08 | PhenoScanner - Neale-B_UKBB_EUR_2017 |
| Primary / Intrinsic cardiomyopathies                                | 4.59E-06 | Cerebrovascular portal - UKBB        |
| Systolic blood pressure                                             | 2.38E-05 | PhenoScanner - Neale-B_UKBB_EUR_2017 |
| Treatment with cetirizine 10mg tablet                               | 3.16E-05 | PhenoScanner - Neale-B_UKBB_EUR_2017 |
| Cardiomyopathy                                                      | 3.50E-05 | PhenoScanner - Neale-B_UKBB_EUR_2017 |
| Vascular or heart problems diagnosed by doctor: high blood pressure | 3.64E-05 | PhenoScanner - Neale-B_UKBB_EUR_2017 |
| Treatment with enalapril                                            | 4.32E-05 | PhenoScanner - Neale-B_UKBB_EUR_2017 |
| Self-reported hypertension                                          | 4.41E-05 | PhenoScanner - Neale-B_UKBB_EUR_2017 |
| Trunk fat percentage                                                | 7.01E-05 | PhenoScanner - Neale-B_UKBB_EUR_2017 |
| Vascular or heart problems diagnosed by doctor: none of the above   | 9.20E-05 | PhenoScanner - Neale-B_UKBB_EUR_2017 |
| Cardiomyopathy                                                      | 1.10E-05 | Cerebrovascular portal - UKBB        |
| Disease of lips                                                     | 3.74E-04 | Cerebrovascular portal - UKBB        |
| Coronary atherosclerosis                                            | 5.97E-04 | Cerebrovascular portal - UKBB        |
| Excessive of frequent menstruation                                  | 8.58E-04 | Cerebrovascular portal - UKBB        |
| Body Mass Index                                                     | 0.13     | Cerebrovascular portal               |
| Coronary artery disease                                             | 0.17     | Cerebrovascular portal               |
| Triglycerides                                                       | 0.19     | Cerebrovascular portal               |
| Chronic kidney disease                                              | 0.19     | Cerebrovascular portal               |
| TOAST other undetermined                                            | 0.21     | Cerebrovascular portal               |
| Type 2 diabetes                                                     | 0.27     | Cerebrovascular portal               |

|                                        |      |                        |
|----------------------------------------|------|------------------------|
| Non-lobar ICH                          | 0.29 | Cerebrovascular portal |
| TOAST small artery occlusion           | 0.31 | Cerebrovascular portal |
| Type 2 diabetes adj BMI                | 0.35 | Cerebrovascular portal |
| HDL cholesterol                        | 0.36 | Cerebrovascular portal |
| Cholesterol                            | 0.43 | Cerebrovascular portal |
| eGFR-creat (creatinina sérica)         | 0.47 | Cerebrovascular portal |
| Waist-hip ratio                        | 0.51 | Cerebrovascular portal |
| TOAST large artery atherosclerosis     | 0.52 | Cerebrovascular portal |
| LDL cholesterol                        | 0.56 | Cerebrovascular portal |
| Urinary albumin-to-creatinine ratio    | 0.57 | Cerebrovascular portal |
| TOAST cardio-aortic embolism           | 0.58 | Cerebrovascular portal |
| Microalbuminuria                       | 0.59 | Cerebrovascular portal |
| Cerebral white matter hyperintensities | 0.64 | Cerebrovascular portal |
| Lobar ICH                              | 0.84 | Cerebrovascular portal |
| Waist-hip ratio adj Body Mass Index    | 0.94 | Cerebrovascular portal |
| Height                                 | 0.98 | Cerebrovascular portal |

**Online Table XV.** Associations of rs76484331 and clinical variants according to the additive model.

|                      | rs76484331    |               |               | p  |      |
|----------------------|---------------|---------------|---------------|----|------|
|                      | RA            |               |               |    |      |
|                      | A             | CC            | AC            | AA |      |
| Sex, male (%)        | 663 (55.1)    | 69 (58.5)     | 1 (33.3)      |    | 0.58 |
| AF (%)               | 329 (27.4)    | 30 (25.4)     | 2 (66.7)      |    | 0.28 |
| DM (%)               | 302 (25.1)    | 27 (22.9)     | 0 (0)         |    | 0.53 |
| HTN (%)              | 786 (65.6)    | 80 (68.4)     | 1 (33.3)      |    | 0.41 |
| ST (%)               | 334 (33.9)    | 40 (41.2)     | 0 (0)         |    | 0.16 |
| <b>TOAST (%)</b>     |               |               |               |    |      |
| CE                   | 504 (43.2)    | 49 (42.2)     | 3 (100)       |    | 0.14 |
| LAA                  | 204 (17.5)    | 15 (13.2)     | 0 (0)         |    | 0.37 |
| Age (Years. IQR)     | 75 (65-82)    | 77 (64-82)    | 80 (72-85)    |    | 0.77 |
| Baseline NIHSS (IQR) | 12 (7-18)     | 12 (6-17)     | 10 (9-12)     |    | 0.71 |
| Glucose (mg/dl. IQR) | 120 (103-147) | 117 (101-144) | 142 (129-157) |    | 0.30 |
| OTT (min. IQR) †     | 130 (90-180)  | 120 (90-175)  | 100 (88-110)  |    | 0.50 |
| SBP (mm Hg. IQR)     | 154 (138-172) | 157 (143-170) | 136 (127-159) |    | 0.65 |
| DBP (mm Hg. IQR)     | 82 (71-98)    | 81 (70-100)   | 58 (57-89)    |    | 0.37 |

† OTT was available in 788 participants.

For categorical variables, frequencies as percentage were described. For continuous variables, median values, interquartile range (IQR) were calculated.

RA: Risk allele; PH: Parenchymal hematoma; AF: Atrial Fibrillation; DM: Diabetes; HTN: Arterial hypertension; ST: Statins; TOAST: Trial of Org 1072 in Acute Stroke Treatment; CE: Cardioembolism; LAA: Large-artery atherosclerosis; NIHSS: National Institutes of Health Stroke Score; OTT: Time from onset to treatment; SBP: Systolic blood pressure; DBP: Diastolic blood pressure.

**Online Table XVI.** Associations of rs76484331 and clinical variants according to the dominant-recessive model.

|                      | Genotype rs76484331 |               |         | p |
|----------------------|---------------------|---------------|---------|---|
|                      | RA<br>A             | CC            | AC + AA |   |
| Sex, male (%)        | 663 (55.1)          | 70 (57.9)     | 0.56    |   |
| AF (%)               | 329 (27.4)          | 32 (26.4)     | 0.81    |   |
| DM (%)               | 302 (25.1)          | 27 (22.3)     | 0.50    |   |
| HTN (%)              | 786 (65.6)          | 81 (67.5)     | 0.68    |   |
| ST (%)               | 334 (33.9)          | 40 (40)       | 0.23    |   |
| <u>TOAST (%)</u>     |                     |               |         |   |
| CE                   | 504 (43.2)          | 52 (43.7)     | 0.91    |   |
| LAA                  | 204 (17.5)          | 15 (12.8)     | 0.20    |   |
| Age (Years. IQR)     | 75 (65-82)          | 77 (64-82)    | 0.80    |   |
| Baseline NIHSS (IQR) | 12 (7-18)           | 12 (7-17)     | 0.46    |   |
| Glucose (mg/dl. IQR) | 120 (103-147)       | 118 (101-144) | 0.33    |   |
| OTT (min. IQR) †     | 130 (90-180)        | 120 (88-173)  | 0.58    |   |
| SBP (mm Hg. IQR)     | 154 (138-172)       | 157 (140-170) | 0.61    |   |
| DBP (mm Hg. IQR)     | 82 (71-98)          | 81 (70-100)   | 0.29    |   |

† OTT was available in 788 participants.

For categorical variables, frequencies as percentage were described. For continuous variables, median values, interquartile range (IQR) were calculated.

RA: Risk allele; PH: Parenchymal hematoma; AF: Atrial Fibrillation; DM: Diabetes; HTN: Arterial hypertension; ST: Statins; TOAST: Trial of Org 1072 in Acute Stroke Treatment; CE: Cardioembolism; LAA: Large-artery atherosclerosis; NIHSS: National Institutes of Health Stroke Score; OTT: Time from onset to treatment; SBP: Systolic blood pressure; DBP: Diastolic blood pressure.

II. Online Figures.  
Online Figure I. Analysis overview.

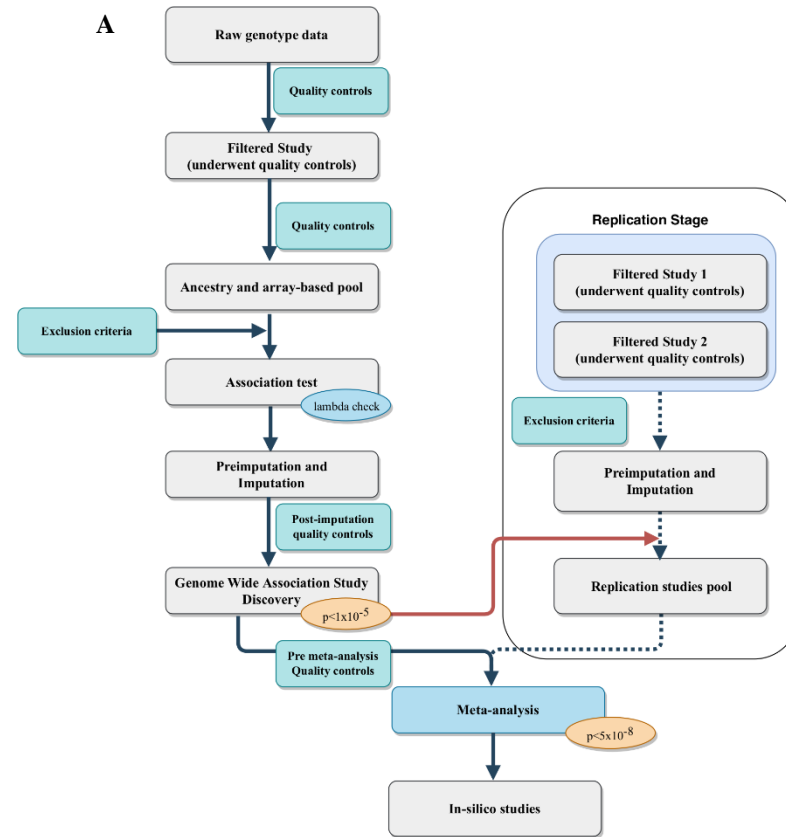

**B**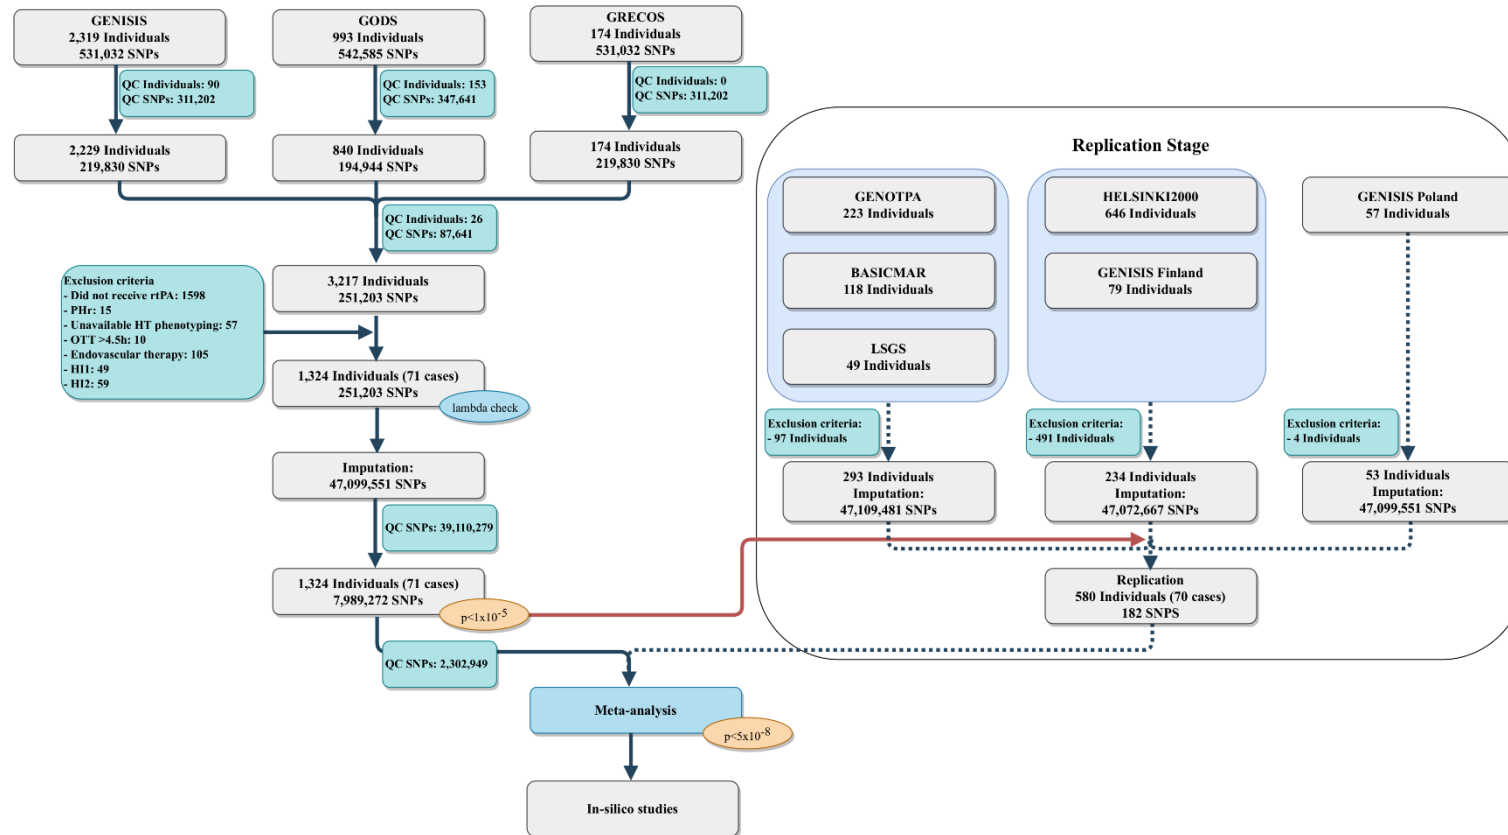

**A.** Workflow of the analysis. **B.** Workflow of samples and SNPs of the discovery and replication stage. Red line represents the selection of SNPs that achieved nominal significance ( $p < 1 \times 10^{-5}$ ) that were selected for replication stage.

**Online Figure II.** Principal components included in the discovery stage.

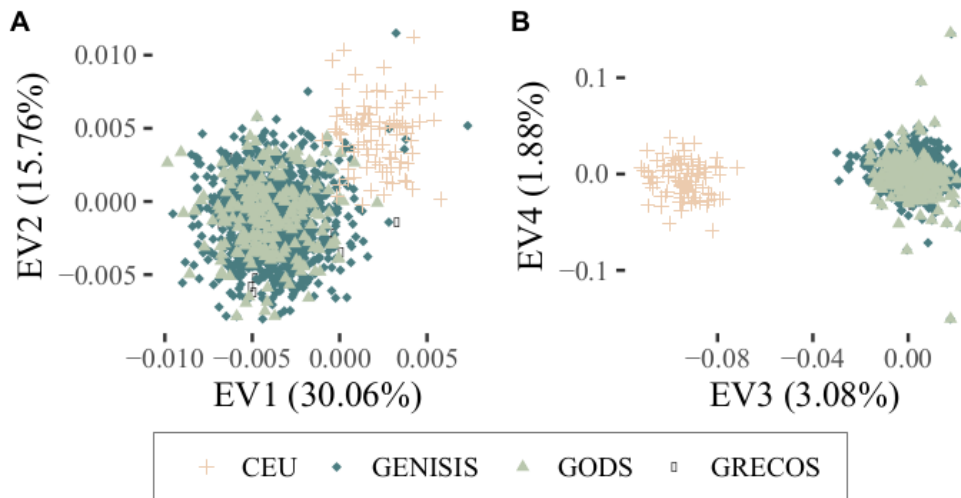

EV: Eigenvector; CEU: Central European ancestry population; GENISIS, Genetics of Early Neurological Instability after Ischemic Stroke project; GODS, Genetic contribution to functional Outcome and Disability after Stroke project; GRECOS, Genotyping Recurrence Risk of Stroke. Axis labels indicate the percentage of variance explained by the eigenvector. Central European ancestry population belongs to The HapMap 3 project.

**Online Figure III.** Principal components included in the replication stage.

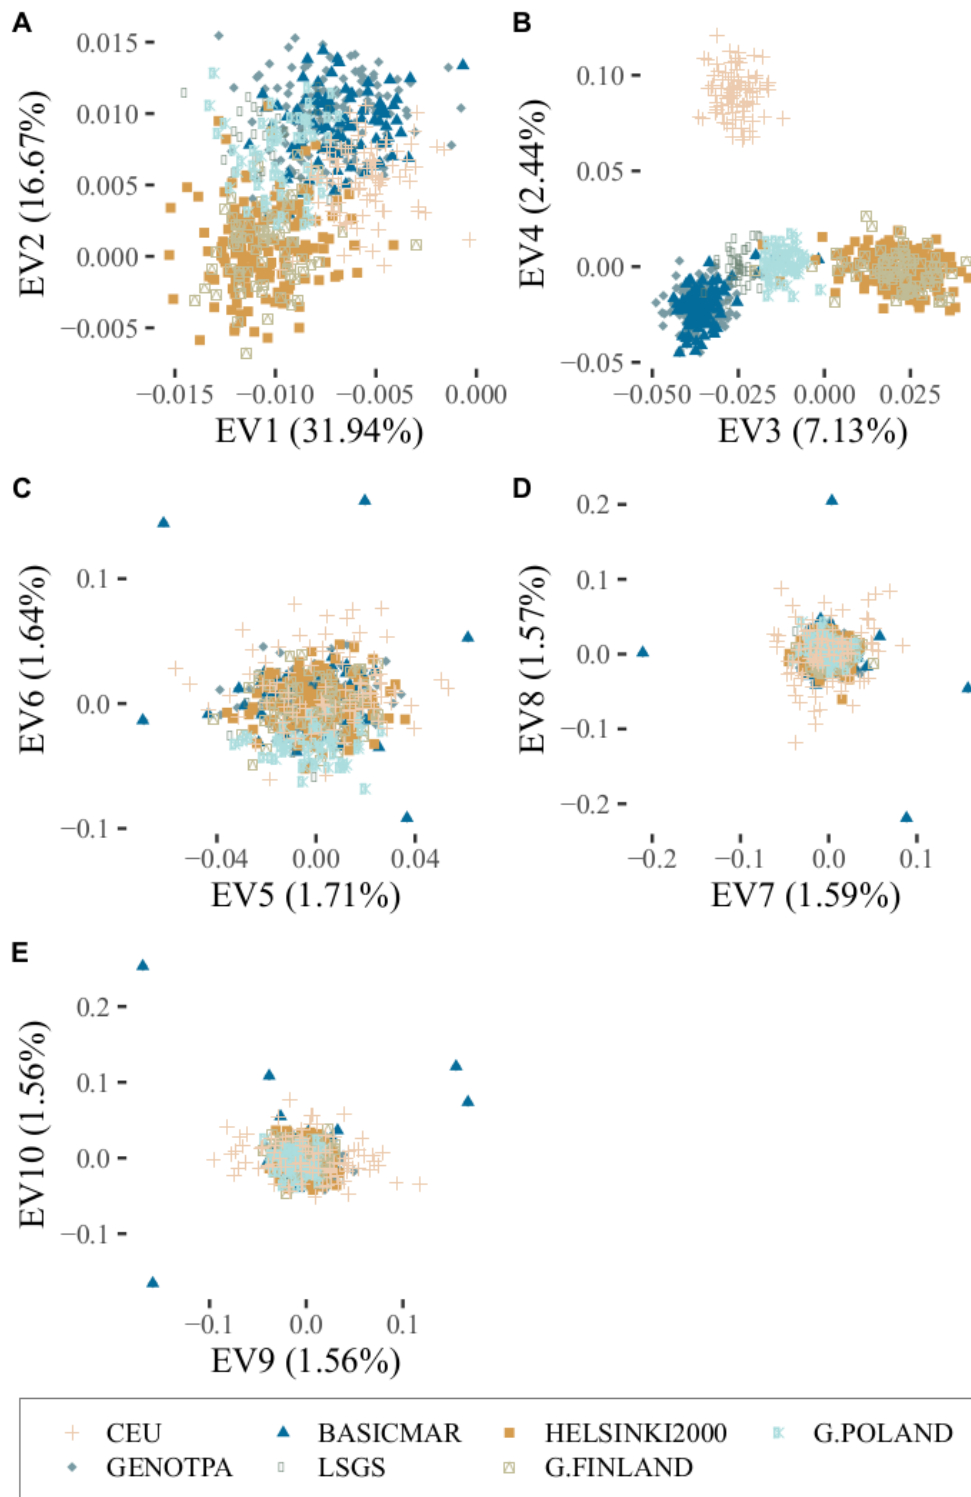

EV: Eigenvector; CEU: Central European ancestry population; GenoTPA, Genetic study in ischemic stroke patients treated with t-PA; BASICMAR, Base de Datos de Ictus del Hospital del Mar; LSGS, Leuven Stroke Genetics Study; HELSINKI2000, Helsinki 2000 Ischemic Stroke Genetics Study; G.FINLAND: GENISIS Finland. G.POLAND: GENISIS Poland. Axis labels indicate the percentage of variance explained by the eigenvector. Central European ancestry population belongs to The HapMap 3 project.



Online Figure IV. Manhattan plot and QQ plot of the discovery phase.

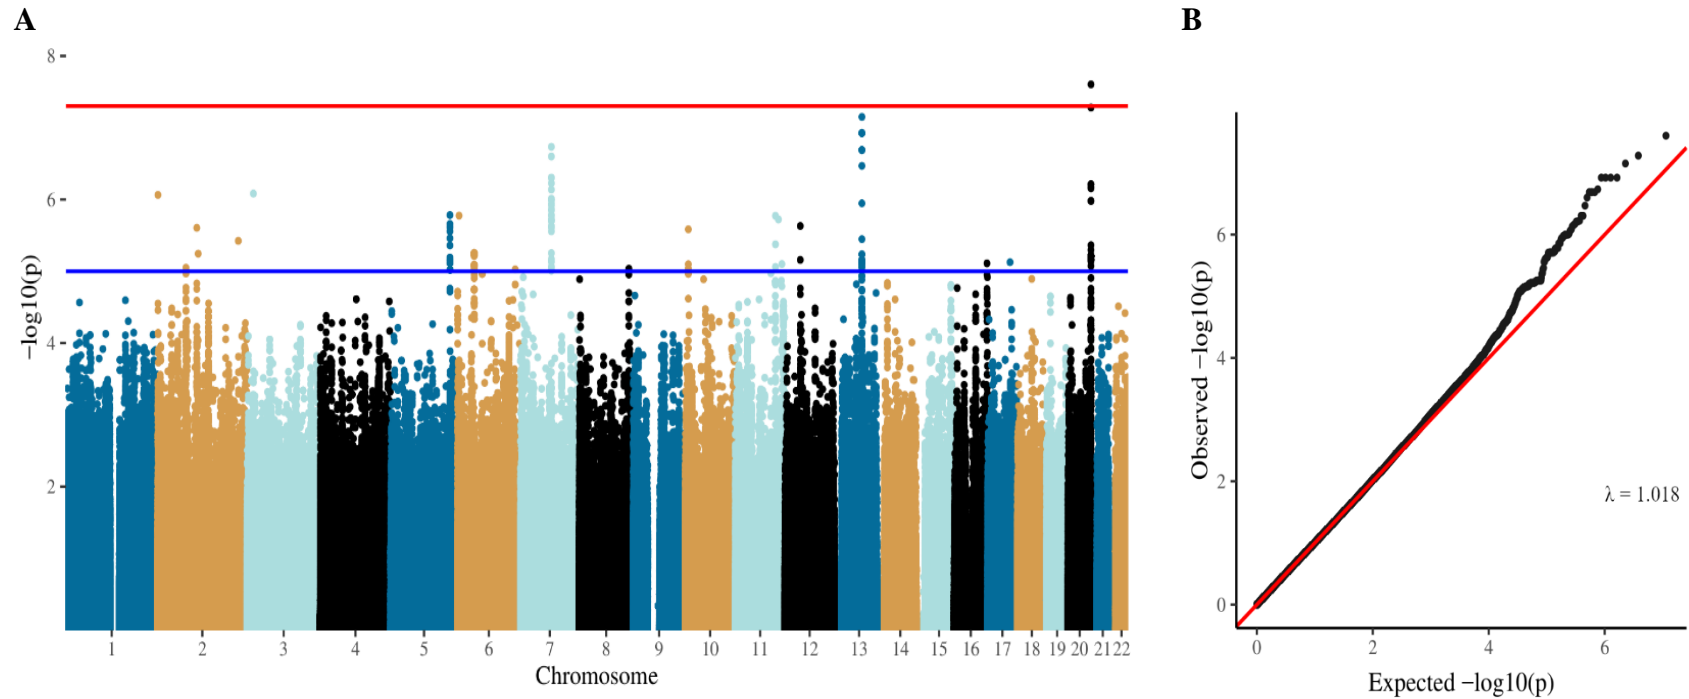

- A. Manhattan plot of genome-wide association discovery-study. SNPs were represented by dots and plotted based on their genome-wide association study p-values. Redline shows genome-wide significance ( $p < 5 \times 10^{-8}$ ) and blue line represents the suggestive association significance threshold ( $p < 1 \times 10^{-5}$ ). Results were adjusted for age, sex, baseline NIH Stroke Scale score, diabetes, and three principal components.
- B. Quantile-quantile plot of the p-values obtained after the association testing. The x-axis represents the expected  $-\log_{10}$  p-value under the null hypothesis and lambda is the median of the resulting chi-squared test statistics divided by the expected median of the chi-squared distribution under the null hypothesis.

Online Figure V. Gene expression of *ZBTB46* in human tissues.

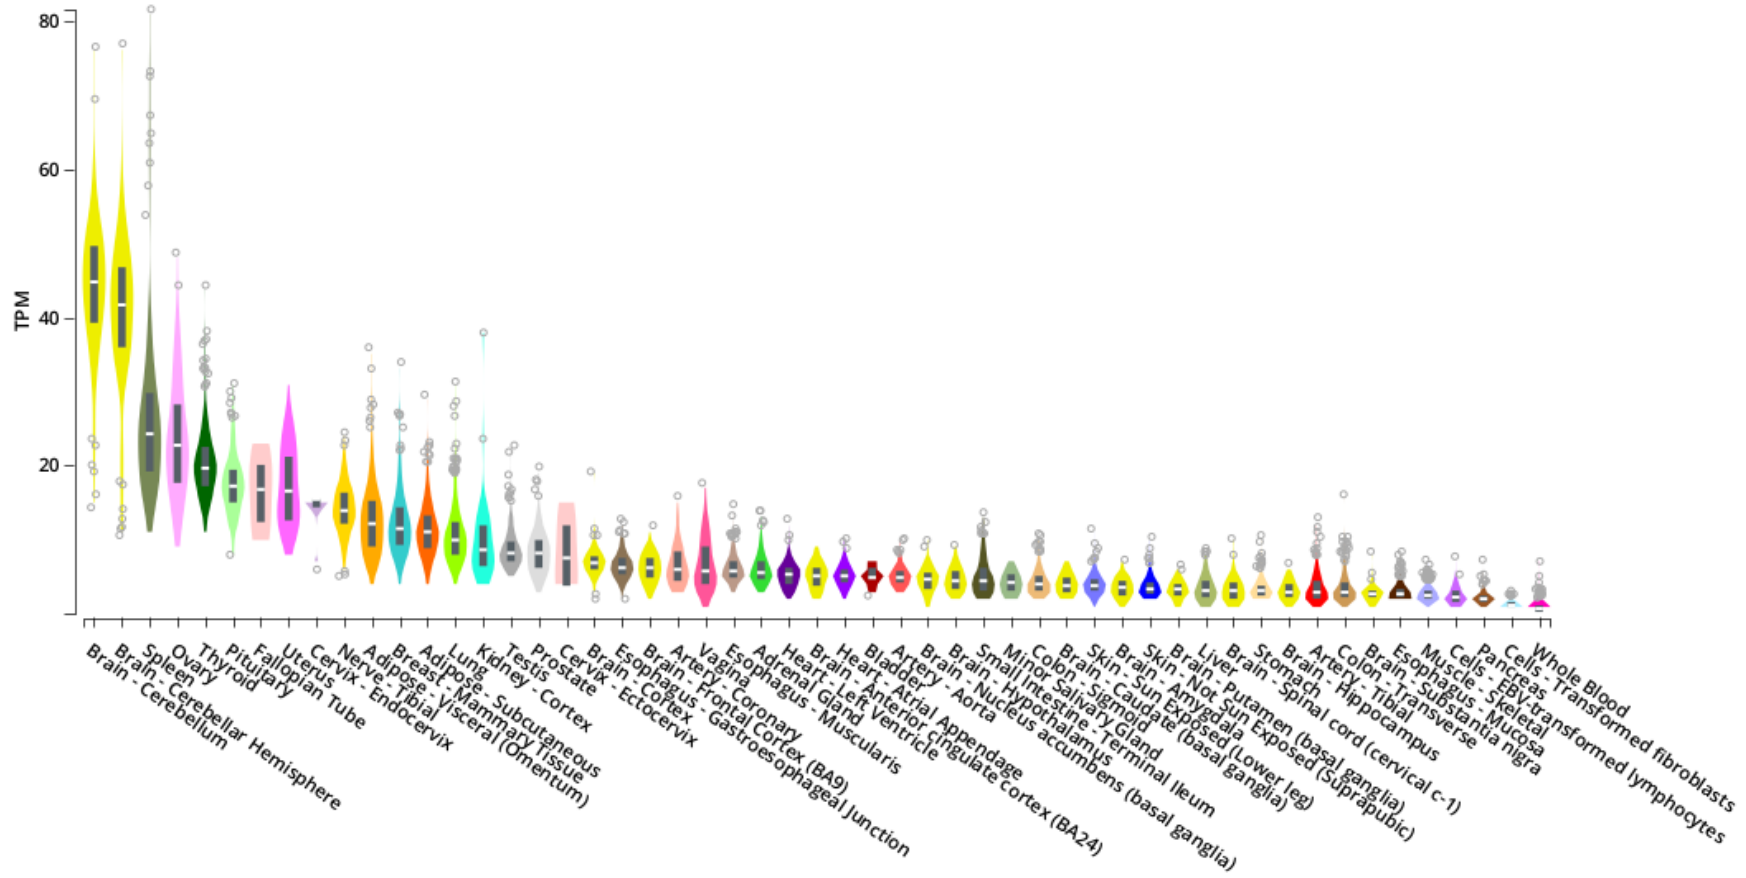

Gene expression for *ZBTB46* (ENSG00000130584.6) was represented by Transcripts per Million (TPM). Data were extracted from GTEx portal on 06/20/2019

**Online Figure VI.** Expression of *ZBTB46* transcript across brain tissues from BRAINEAC (Braineac.org) database, web server for data from the UK Brain Expression Consortium (UKBEC). The UKBEC dataset consists of 134 individuals in ten CNS regions including the cerebellum (CRBL), n = 130; frontal cortex (FCTX), n = 127; temporal cortex (TCTX), n = 119; putamen (PUTM), n = 129; occipital cortex (OCTX), n = 129; hippocampus (HIPPP), n = 122; medulla (MEDU), n = 119; substantia nigra (SNIG), n = 101; thalamus (THAL), n = 124; and white matter (WHMT), n = 131.

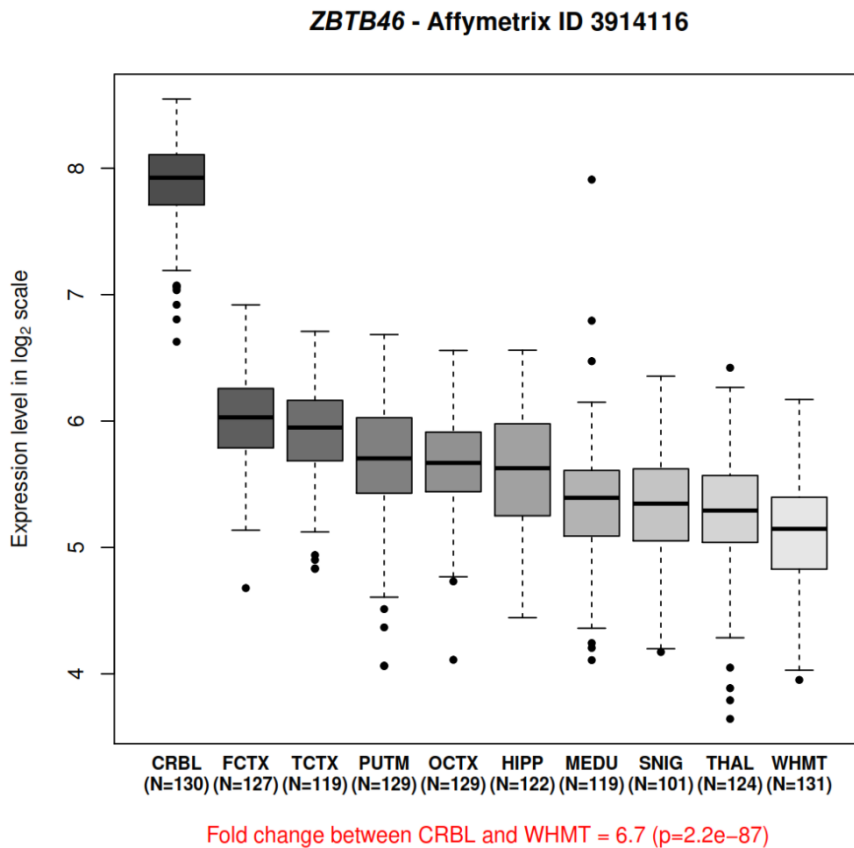

Online Figure VII. Capture Hi-C interactions of rs76484331 in GM12878 cells.

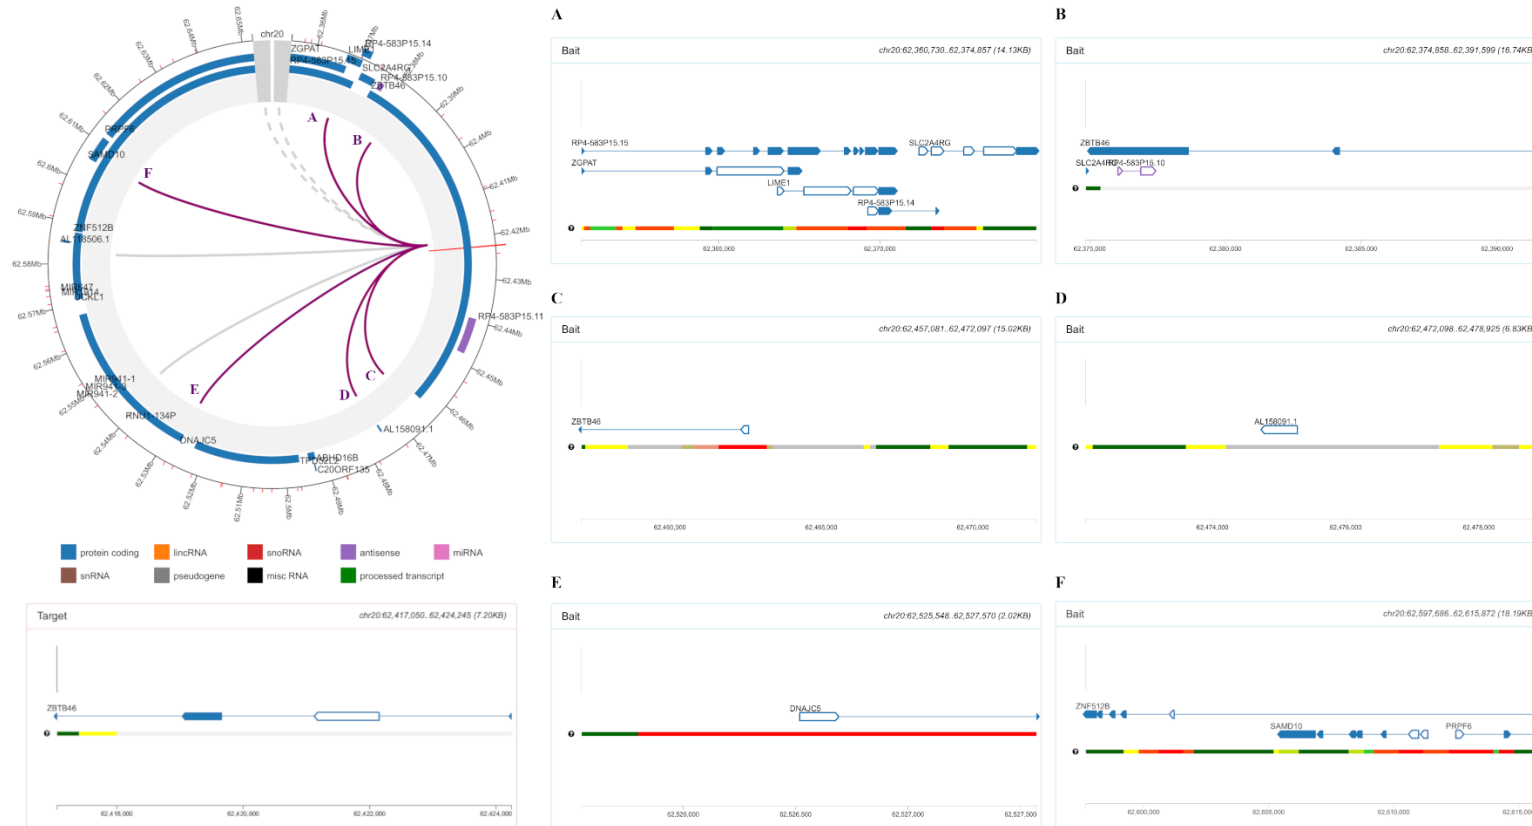

The left diagram shows the location of the variant rs76484331 (red line across all the tracks) and its interactions with DNA regulatory elements (purple arcs A-F), the diagram was restricted to a window of 300 Kb. The red panel presented the target (rs76484331), whether blue panels (A-F) represent the chromatin fragments identified as baits. The panels illustrate canonical genes transcripts, where exons with a white are those containing transcriptional start sites. Each bait region is identified by colors: yellow – enhancers; dark green – weak transcription; light green – transcription at gene 5' and 3'; red – flanking active transcription start sites. Data were extracted from GTEx portal on 10/29/2019.

### III. Online Methods.

#### I. Description of the cohorts used the discovery stage.

##### *Genetics of Early Neurological Instability after Ischemic Stroke (GENISIS)*

GENISIS is an international project which aim is to capture the variety of mechanisms related to brain injury and early recovery. The study consisted in ischemic stroke patients, with neurological evaluation (NIHSS)<sup>1</sup> within 6 hours from onset of symptoms and 24-hours follow-up. The stroke diagnosis was performed by trained neurologists and confirmed by neuroimaging. Participants had to be over the age of 18 years, have provided informed consent, and do not underwent endovascular thrombectomy. Local Institutional Review Boards approved the enrolling and the data collection in each site<sup>2</sup>.

Patients treated with rtPA and information of hemorrhagic transformation were selected from Spain recruitment sites: Vall d'Hebron University Hospital, Hospital Universitari Germans Trias I Pujol, Hospital Universitari del Mar, Hospital de la Santa Creu i Sant Pau, Mutua de Terrassa University Hospital, Hospital Universitario de Albacete, Hospital Clínico Universitario Valladolid, Hospital Clínico Universitario de Santiago, Hospital Virgen del Rocío y Virgen de la Macarena, Hospital Universitari Son Espases, Hospital Clinic. Meanwhile for replication stage, participants from Finland (Helsinki University Central Hospital) and Poland (Jagiellonian University Hospital) were included.

##### *Genetic contribution to functional Outcome and Disability after Stroke (GODS)*

Subjects with diagnosis of acute ischemic stroke, baseline NIHSS<sup>1</sup> assessment >4, and functional outcome<sup>3</sup> at 90 days were selected from the Spanish Stroke Genetics Consortium (GeneStroke). Diagnosis of ischemic stroke was based on neurological symptoms and neuroimaging. Subjects were excluded whether aged <18 years old, concomitant pathology or recurrent stroke during the 3 months follow-up occurs, and posterior vascular territory infarction or lacunar stroke were detected. Each one of the Ethics Committees of the participating centers approved the study, and all patients or relatives signed the informed consent<sup>4</sup>.

Acute ischemic stroke participants were recruited at Spanish centers: Hospital Universitari del Mar (Barcelona), Hospital Universitari Son Espases (Mallorca), Vall d' Hebron University Hospital (Barcelona), Hospital Clínic (Barcelona), Hospital Universitari de Girona Doctor Josep Trueta (Girona), Hospital de la Santa Creu i Sant Pau (Barcelona), Hospital Universitari Germans Trias I Pujol (Can Ruti) and Hospital de Basurto (Bilbao). All the selected patients received intravenous thrombolytic therapy.

##### *Genotyping Recurrence Risk of Stroke (GRECOS)*

Consecutive Caucasian patients, aged >18 years old, with a first ischemic stroke that were admitted to the emergency department of 23 Spanish Hospitals were recruited. Stroke diagnosis was performed by trained neurologists, according to the World Health Organization definition<sup>5</sup> and confirmed by neuroimaging. For the present study, we selected patients treated with rtPA, who were enrolled at the Vall d' Hebron University Hospital.

Patients with modified Rankin Scale (mRS)<sup>3</sup> at discharge  $\geq 4$ , with a life expectancy lower than one year at the time of inclusion, and patients participating in a clinical trial of secondary

prevention of stroke were excluded. On basis of their experience and information provided by other physicians, the neurologists decided whether to include or exclude each patient from the study. Risk factors, clinical evolution and radiological data were collected from the clinical records during hospitalization. One-year follow-up were performed to record the occurrence of ischemic stroke recurrence or global vascular recurrences. Moreover, each participant received a phone call and standard questionnaires to capture follow-up clinical and demographic every 3 months. The study was approved by the ethics committee, and all patients or their relatives gave informed written consent.<sup>6</sup> PH cases were selected and then matched with controls. The balance was at least 1:1 and we considered hospital of recruitment, age ( $\pm 10$  years) sex and TOAST.

## II. Description of the cohorts for the replication stage.

PH cases were selected and then matched with controls. The balance was at least 1:1 and we considered hospital of recruitment, age ( $\pm 10$  years) sex and TOAST.

### *The Genetic study in ischemic stroke patients treated with tPA (GenoTPA)*

We recruited consecutive Caucasian patients with acute ischemic stroke who were admitted to the emergency room and received rtPA within 4.5 hours of onset of symptoms. Patients were enrolled at Spanish hospitals (Vall d'Hebron University Hospital, Hospital Clinic, Hospital Universitari de Girona Doctor Josep Trueta, Hospital de la Santa Creu i Sant Pau, Hospital Universitari Germans Trias I Pujol, Hospital Universitari del Mar, Hospital de Basurto) between 2002 to 2012. The study protocol was approved by the Ethics Committee of each center, all patients or relatives signed the informed consent.

Patients were identified by medical evaluation at emergency room arrival; stroke diagnosis was performed by trained neurologists and confirmed by neuroimaging. There were no exclusion criteria regarding age, sex or ethnicity. Follow-up CT scan at 24 hours after onset of symptoms or if neurological worsening occurred were performed and was classified according to European Cooperative Acute Stroke Study (ECASS)<sup>7</sup>.

### *BASe de datos de ICTus del hospital del Mar (BASICMAR)*

The Stroke database from Hospital del Mar (BASICMAR) is an ongoing prospective study of all acute strokes assessed since 2005 at the IMIM-Hospital Universitari del Mar (Barcelona, Spain). The hospital serves three of the ten districts in Barcelona, Spain providing medical care for a population of 339,196. Patients with first-ever and recurrent stroke are included. There are no exclusion criteria regarding age, sex or ethnicity. All participants provided written consent. Clinical evaluation and neuroimaging were assessed by trained neurologist. Patients with acute infarct confirmed radiographically and treated with thrombolysis therapy were selected<sup>8</sup>.

### *Leuven Stroke Genetics Study (LSGS)*

Patients admitted to the Stroke Unit of the University Hospitals at Leuven, Belgium between 2005 and 2009 were enrolled. Subjects were European descent, aged 18 years or older with acute cerebral ischemia, defined as a clinical stroke with imaging confirmation. All participants underwent brain imaging and a standardized protocol including lab examination, carotid ultrasound, and cardiac examination<sup>8</sup>. Those who received rtPA and with 24 hours follow-up CT scan were select. Hemorrhagic transformation subtype was determining following the European

Cooperative Acute Stroke Study (ECASS)<sup>7</sup>. Written informed consent was obtained from all subjects.

#### *Helsinki 2000 Ischemic Stroke Genetics Study (HELSINKI2000).*

The study was designed for investigating genetic factors underlying ischemic stroke in a Finnish population and in the long-term to be incorporated to multicenter multinational similar datasets. This study received approval from local ethics committee (October 27, 2010; and Amended June 27, 2016). All ischemic stroke cases in this study were recruited from the Helsinki University Central Hospital, which is the only neurological emergency unit for a population of 1.5 million inhabitants<sup>9</sup>. Only patients with positive neuroimaging findings for a new-onset brain infarction were recruited following written informed consent. All included subjects are of Finnish Caucasian origin.

### **III. Clinical risk factors definitions.**

Atrial fibrillation (AF), the subject carries a pre-existing diagnosis of AF, and may or may not be anticoagulated; or the subject has an EKG in the EMR showing AF.

Diabetes mellitus (DM), when a pre-existing diagnosis of diabetes is present and is taking diabetic medication (oral and/or insulin). A pre-existing diagnosis of diabetes is not taking diabetic medication and has an elevated blood sugar at the time of acute evaluation.

Arterial hypertension (HTN), when the subject carries a pre-existing diagnosis of arterial hypertension; and may or may not be treated by antihypertensive medication.

Statins (ST), whether the subject (or family member) confirms that they are regularly taking a medication within the statin family and/or a medication within the statin family is listed on the medication reconciliation at admission.

Stroke etiologic subtypes (TOAST), the ischemic stroke (IS) subtypes were classified according to the Trial of ORG 10172 in Acute Stroke Treatment (TOAST)<sup>10</sup>:

Cardioembolism (CE), IS resulted from an embolism originating in the heart.

Large Artery Atherosclerosis (LAA), IS resulted from occlusion of a large, major named vessel of the brain or neck.

Small Vessel Occlusion (SVO), lacunar syndrome with or without evidence of ischemic lesion less than 1.5 cm in diameter in the brain stem or subcortical white matter.

Other Etiology (OT), rare causes such as non-atherosclerotic vasculopathies, hematologic disorders, or hypercoagulable states.

Undetermined Etiology (UND) includes: two or more causes, a negative evaluation (unknown etiology), or incomplete evaluation.

Baseline NIHSS, National Institutes of Health Stroke Scale<sup>1</sup> (0-42 points) assessed at the initial clinical evaluation.

Glucose, a measurement of the blood glucose level in mg/dl obtained in the acute setting during the initial clinical evaluation or before rtPA bolus.

Time from onset to treatment (OTT), was calculated using the time when the patient was last known seen without neurologically symptoms and the time of rtPA bolus administration. Whether the patient was sleeping and wakes up with symptoms, the last time the patient was known to have been alert and oriented.

Blood pressure (SBP / DBP), was measured in mmHg at the time of admission to the emergency department, prior to rtPA bolus.

#### **IV. Genome-Wide Association Studies and meta-analysis quality controls.**

Pre-imputation quality controls were applied using PLINK v1.9. Briefly, samples filters included sex discordance, duplicate or kinship ( $P_{ihat} > 0.18$ ), missing data rate ( $> 5\%$ ) and batch effects. As well, ethnic outliers from European ancestry were discarded ( $> 6$  SDs from mean) by a projection of principal components (PC) onto HapMap3 data. Genetic variants were removed based on genotyping call rate ( $< 97\%$ ), minor allele frequency (MAF  $< 1\%$ ) and significantly out Hardy Weinberg equilibrium ( $p = 1 \times 10^{-6}$ )<sup>11</sup>. Further, A/T and C/G SNPs were discarded to avoid unreliable strand orientation; then polymorphisms were aligned with the 1000 Genome Project (1000G) Phase 3 reference panel<sup>12</sup>.

Later than imputation, genetic variants with R-square imputation accuracy lower than 0.3, allele frequency value of 1%, and concordance difference by more than  $\pm 0.2$  among studied and the reference population allele frequencies were excluded.

Prior meta-analysis, the discovery and replication studies underwent harmonization and quality controls<sup>13</sup>, consisting of MAF ( $< 0.03$ ), imputation accuracy ( $< 0.5$ ) and extreme effect values ( $\beta \geq 4$  or  $\leq -4$ ).

#### **V. Independent genomic loci and functional annotation.**

Independent SNPs were selected based on genome-wide significance and  $r^2 < 0.6$  within a 250 Kb gene window size, the lead SNP was identified using 1000G Phase 3. Functional annotation was performed through the Annotate Variation (ANNOVAR) system<sup>14</sup> and the Functional Mapping and Annotation of Genome-wide Association Studies (FUMA)<sup>15</sup>.

#### **VI. Polygenic Risk Score generation.**

We performed the best-fit function of PRSice-2, which runs logistic regressions to determine the p-threshold with the largest variance explained by the PRS, assessed as the increment in Nagelkerke's pseudo-R<sup>2</sup>. The best-fit for the PRS estimation of disability after three months was observed for a threshold of  $p = 0.00530005$ , pseudo-R<sup>2</sup> = 0.0684721, and composed by 3,506 SNPs.

Welch Two Sample t-test was performed to further study this PRS against PH, mortality after 3 months and in-hospital mortality in the replication cohort. Significant association was observed with PH and mortality after 3 months, but we did not find an association with in-hospital mortality (Online Table IX). Interestingly in a multivariable logistic regression for disability after three months the PRS remained significant in the logistic regression after inclusion of clinical variables: NIHSS, sex and age (Online Table X).



## VII. URL.

Cerebrovascular Portal: <https://cerebrovascularportal.org/>  
Capture HiC Plotter: <https://www.-chicp.org/>  
eQTL consortium: <https://www.eqtlgen.org/>  
FUMA: <https://fuma.ctglab.nl/>  
GTEx: <https://gtexportal.org/home/>  
METAL: <https://genome.sph.umich.edu/wiki/METAL;>  
Michigan Imputation Server: <https://imputationserver.sph.umich.edu/index.html#!>;  
PhenoScanner: <http://www.phenoscaner.medschl.cam.ac.uk/>  
PLINK: <http://www.cog-genomics.org/plink2/>  
RegulomeDB: <http://www.regulomedb.org/>  
SHAPEIT: [https://mathgen.stats.ox.ac.uk/genetics\\_software/shapeit/shapeit.html](https://mathgen.stats.ox.ac.uk/genetics_software/shapeit/shapeit.html)  
Single-nuclei Brain RNA-seq expression browser: <http://ngi.pub/snucRNA-seq/>  
SMR & HEIDI: <http://cnsgenomics.com/software/smr/#Overview>  
SNPTEST: [https://mathgen.stats.ox.ac.uk/genetics\\_software/snptest/snptest.html](https://mathgen.stats.ox.ac.uk/genetics_software/snptest/snptest.html)

#### IV. Online References.

1. Brott T, Adams HP, Jr., Olinger CP, Marler JR, Barsan WG, Biller J, Spilker J, Holleran R, Eberle R, Hertzberg V, et al. Measurements of acute cerebral infarction: A clinical examination scale. *Stroke*. 1989;20:864-870
2. Ibanez L, Heitsch L, Dube U, et al. Overlap in the genetic architecture of stroke risk, early neurological changes, and cardiovascular risk factors. *Stroke*. 2019;50:1339-1345
3. Shinohara Y, Minematsu K, Amano T, Ohashi Y. Modified rankin scale with expanded guidance scheme and interview questionnaire: Interrater agreement and reproducibility of assessment. *Cerebrovasc Dis*. 2006;21:271-278
4. Mola-Caminal M, Carrera C, Soriano-Tarraga C, et al. Patj low frequency variants are associated with worse ischemic stroke functional outcome. *Circ Res*. 2019;124:114-120
5. Hatano S. Experience from a multicentre stroke register: A preliminary report. *Bull World Health Organ*. 1976;54:541-553
6. Fernandez-Cadenas I, Mendioroz M, Giralto D, et al. Grecos project (genotyping recurrence risk of stroke): The use of genetics to predict the vascular recurrence after stroke. *Stroke*. 2017;48:1147-1153
7. Larrue V, von Kummer R, del Zoppo G, Bluhmki E. Hemorrhagic transformation in acute ischemic stroke. Potential contributing factors in the european cooperative acute stroke study. *Stroke*. 1997;28:957-960
8. Meschia JF, Arnett DK, Ay H, et al. Stroke genetics network (sign) study: Design and rationale for a genome-wide association study of ischemic stroke subtypes. *Stroke*. 2013;44:2694-2702
9. Putaala J, Metso AJ, Metso TM, Konkola N, Kraemer Y, Haapaniemi E, Kaste M, Tatlisumak T. Analysis of 1008 consecutive patients aged 15 to 49 with first-ever ischemic stroke: The helsinki young stroke registry. *Stroke*. 2009;40:1195-1203
10. Adams HP, Jr., Bendixen BH, Kappelle LJ, Biller J, Love BB, Gordon DL, Marsh EE, 3rd. Classification of subtype of acute ischemic stroke. Definitions for use in a multicenter clinical trial. Toast. Trial of org 10172 in acute stroke treatment. *Stroke*. 1993;24:35-41
11. Anderson CA, Pettersson FH, Clarke GM, Cardon LR, Morris AP, Zondervan KT. Data quality control in genetic case-control association studies. *Nature protocols*. 2010;5:1564-1573
12. Genomes Project C, Auton A, Brooks LD, Durbin RM, Garrison EP, Kang HM, Korbel JO, Marchini JL, McCarthy S, McVean GA, Abecasis GR. A global reference for human genetic variation. *Nature*. 2015;526:68-74
13. Winkler TW, Day FR, Croteau-Chonka DC, et al. Quality control and conduct of genome-wide association meta-analyses. *Nature protocols*. 2014;9:1192-1212
14. Wang K, Li M, Hakonarson H. Annovar: Functional annotation of genetic variants from high-throughput sequencing data. *Nucleic Acids Res*. 2010;38:e164
15. Watanabe K, Taskesen E, van Bochoven A, Posthuma D. Functional mapping and annotation of genetic associations with fuma. *Nat Commun*. 2017;8:1826
